# Supplementary material for: Investigating the Active Oxidants Involved in Cytochrome P450 Catalyzed Sulfoxidation Reactions
Source: PubMed Central journal article supplement — Chemistry. 2022 Nov 9;28(72):e202202428. doi: 10.1002/chem.202202428 (PMC10100219; doi:10.1002/chem.202202428), 2022-11-09
Supplement: CHEM-28-0-s001.pdf [file CHEM-28-0-s001.pdf]

# Chemistry–A European Journal

Supporting Information

## **Investigating the Active Oxidants Involved in Cytochrome P450 Catalyzed Sulfoxidation Reactions**

Matthew N. Podgorski, Tom Coleman, Luke R. Churchman, John B. Bruning,  
James J. De Voss,\* and Stephen G. Bell\*

## Supplementary Information

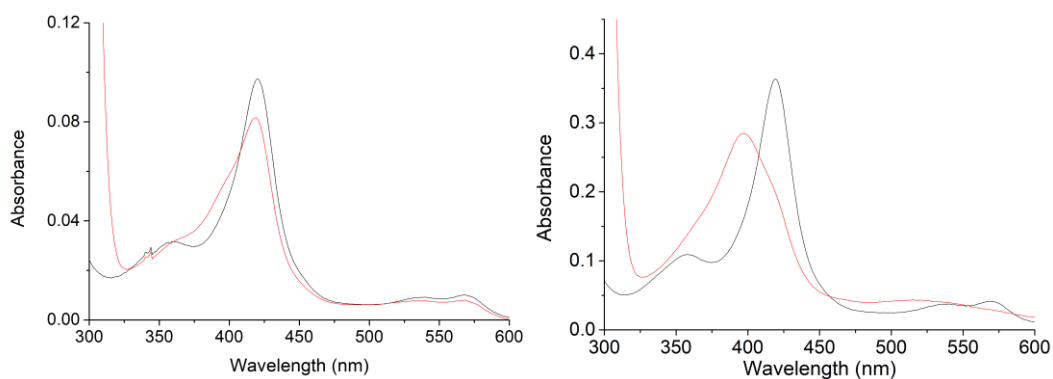

(a) D251N + 4-methylthiobenzoic acid

(b) T252A + 4-methylthiobenzoic acid

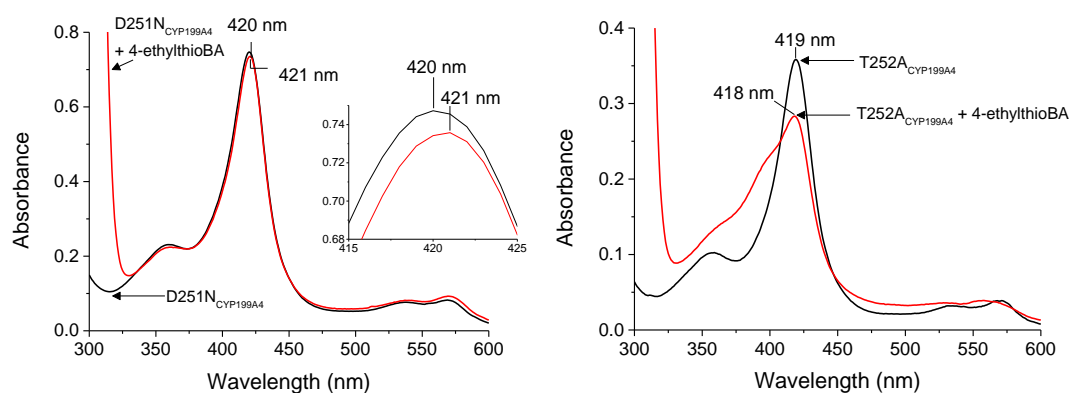

(c) D251N + 4-ethylthiobenzoic acid

(d) T252A + 4-ethylthiobenzoic acid

**Figure S1** Spin-state shifts of (a) D251N<sub>CYP199A4</sub> and (b) T252A<sub>CYP199A4</sub> induced by 4-methylthiobenzoic acid. Also shown are the shifts in (c) D251N<sub>CYP199A4</sub> and (d) T252A<sub>CYP199A4</sub> induced by 4-ethylthiobenzoic acid. The inset in (c) highlights the red shift of the Soret peak.

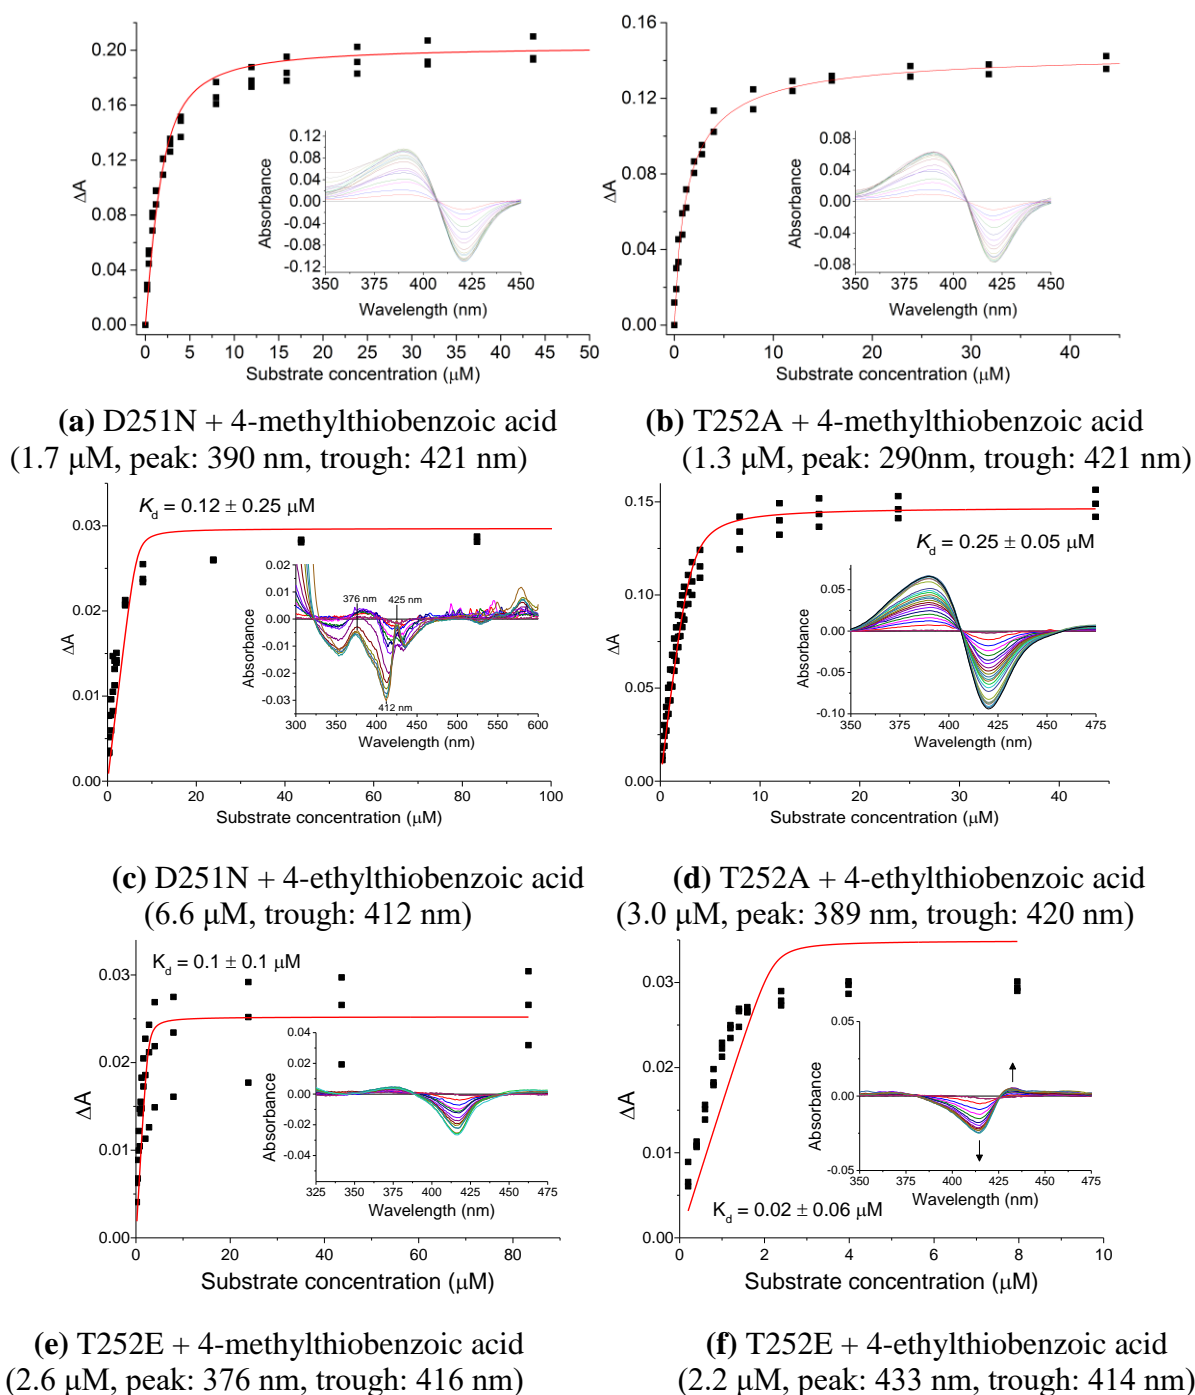

**Figure S2** UV-Vis titrations to determine the dissociation constant of **(a)** D251N<sub>CYP199A4</sub> and **(b)** T252A<sub>CYP199A4</sub> with 4-methylthiobenzoic acid. UV-Vis titrations to determine the dissociation constant of **(c)** D251N<sub>CYP199A4</sub> and **(d)** T252A<sub>CYP199A4</sub> with 4-ethylthiobenzoic acid. UV-Vis titrations to determine the dissociation constant of T252E<sub>CYP199A4</sub> with **(e)** 4-methylthiobenzoic acid and **(f)** 4-ethylthiobenzoic acid. The enzyme concentration used, and the peak and trough wavelengths are provided under each graph. The data were fitted to the Morrison tight-binding equation. As there is no prominent peak at 390 nm in the D251N difference spectrum in **(c)**,  $\Delta A$  was taken to be  $A_{490} - A_{412}$  (baseline - trough).

### Spin-state shifts of T252E<sub>CYP199A4</sub> induced by 4-methylthio- and 4-ethylthio-benzoic acid

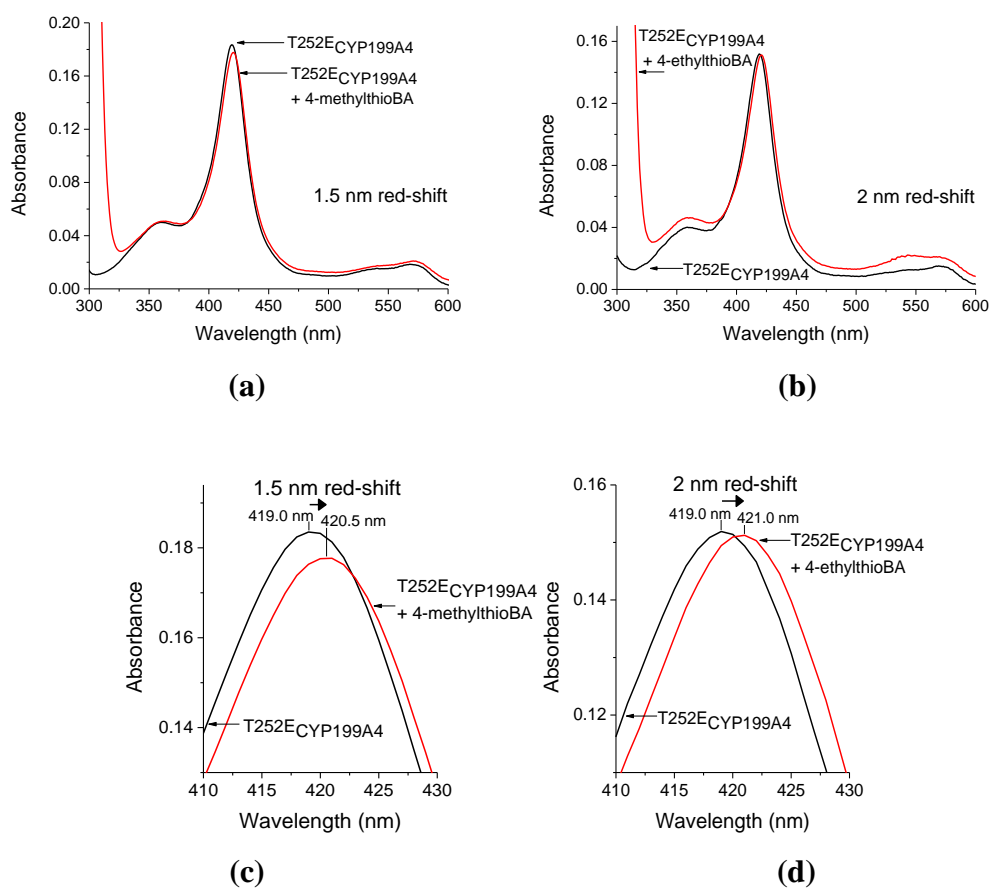

**Figure S3.** Spin-state shifts of the T252E mutant of CYP199A4 induced by (a) 4-methylthiobenzoic acid, and (b) 4-ethylthiobenzoic acid. These substrates induced a red-shift of the Soret band, and these red-shifts are shown more clearly in figures (c) and (d).

## Difference spectra induced by binding of sulfur ligands to P450<sub>cam</sub> and CYP199A4

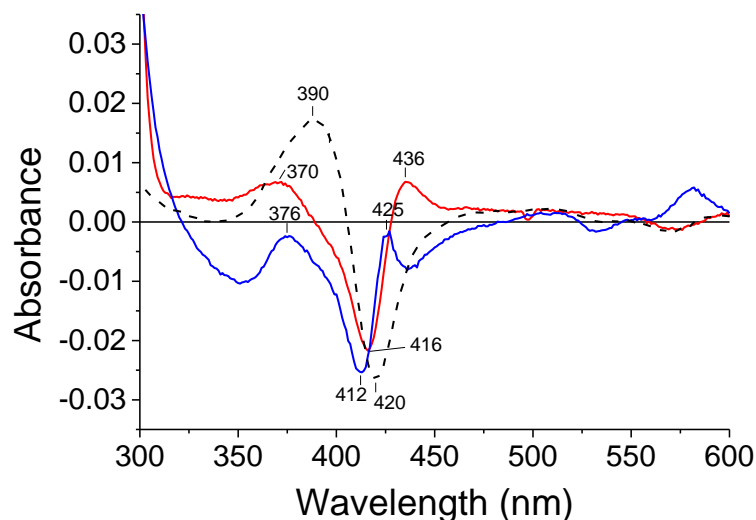

**Figure S4.** Difference spectra of P450<sub>cam</sub> with thioanisole (**red**) and D251N<sub>CYP199A4</sub> with 4-ethylthiobenzoic acid (**blue**). The type I difference spectrum of T252A<sub>CYP199A4</sub> with 4-ethylthiobenzoic acid is also shown as a **black dashed line** for comparison.

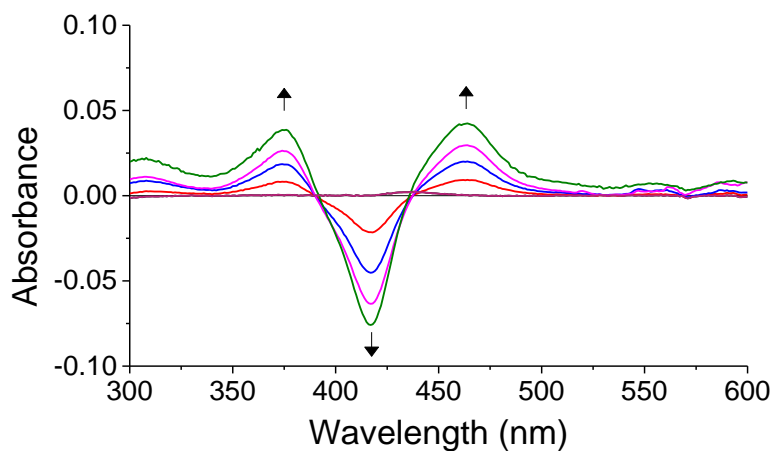

**Figure S5.** Difference spectra of P450<sub>cam</sub> with dithiothreitol (DTT).

**Table S1.** Features of the difference spectra of P450<sub>cam</sub> with thioanisole and DTT and D251N<sub>CYP199A4</sub> with 4-ethylthiobenzoic acid

| Enzyme / Sulfide                                    | Absorbance maxima (nm) | Absorbance minimum (nm) |
|-----------------------------------------------------|------------------------|-------------------------|
| P450 <sub>cam</sub> + thioanisole                   | 370, 436               | 416                     |
| D251N <sub>CYP199A4</sub> + 4-ethylthiobenzoic acid | 376, 425               | 412                     |
| P450 <sub>cam</sub> + DTT                           | 375, 464               | 417                     |

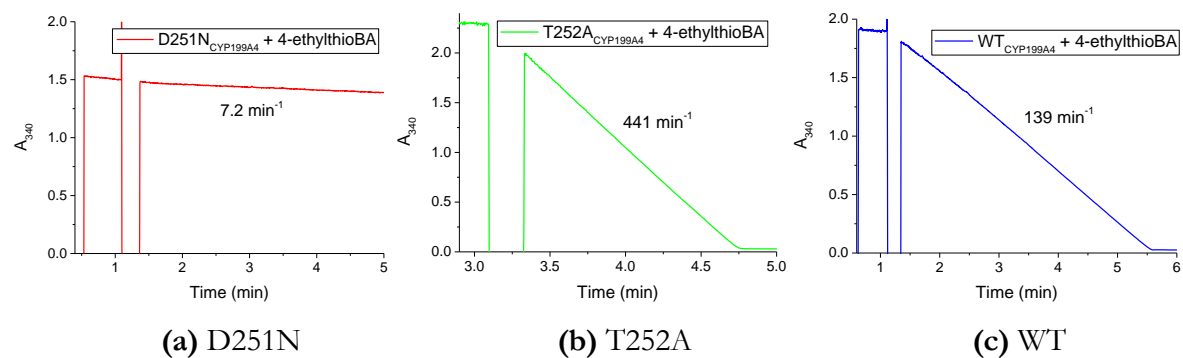

**Figure S6.** Comparison of the rates of NADH consumption by (a) D251N<sub>CYP199A4</sub>, (b) T252A<sub>CYP199A4</sub> and (c) WT<sub>CYP199A4</sub> with 4-ethylthiobenzoic acid.

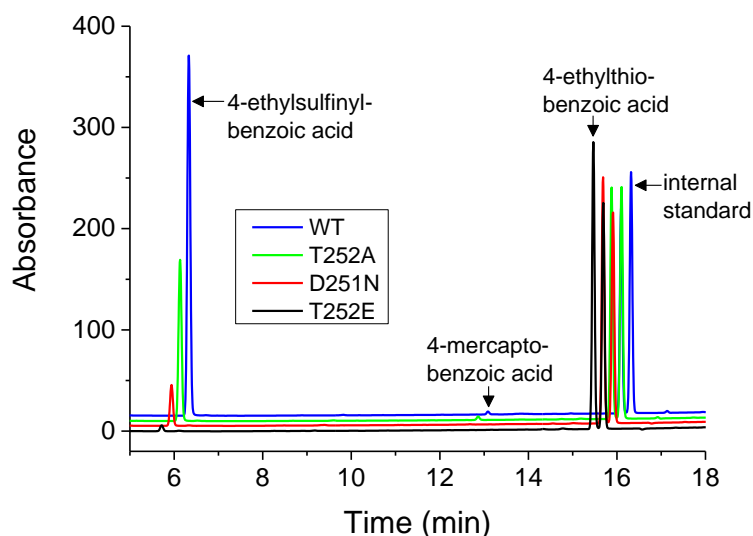

**Figure S7a.** HPLC analysis of the *in vitro* NADH reaction of CYP199A4 variants with 4-ethylthiobenzoic acid. The T252E, D251N, T252A and WT CYP199A4 reactions are shown in **black**, **red**, **green** and **blue**, respectively. Retention times are: 4-ethylsulfinylbenzoic acid, 5.8 min; 4-ethylthiobenzoic acid, 15.5 min; 9-hydroxyfluorene, 15.7 min. Gradient: 20 → 95% MeCN in H<sub>2</sub>O (with 0.1% TFA). No 4-mercaptobenzoic acid was detected in the T252E or D251N turnovers. In the T252A and WT turnovers, minimal 4-mercaptobenzoic acid was formed. In the T252A turnover, the 4-mercaptobenzoic acid peak was ~2% of the size of the sulfoxide peak. In the WT turnover, it was <1% of the size of the sulfoxide peak. In the absence of an authentic sample of 4-ethylsulfinylbenzoic acid for calibration, 4-methylsulfinylbenzoic acid was used.

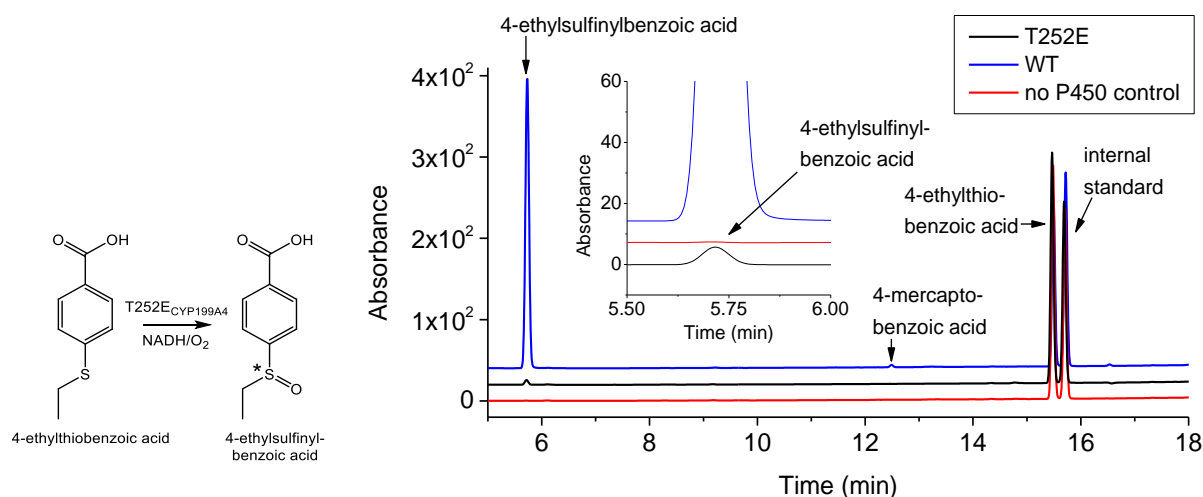

**Figure 7b.** HPLC analysis of the NADH/O<sub>2</sub>-driven oxidation of 4-ethylthiobenzoic acid by T252E (**black**) and WT CYP199A4 (**blue**). In **red** is a control reaction omitting the P450. 4-Ethylsulfinylbenzoic acid appears at 5.7 min and the substrate at 15.5 min.

## HPLC retention times

**Table S2.** HPLC retention times for *para*-substituted benzoic acid substrates and products. Gradient: 20 → 95% acetonitrile in H<sub>2</sub>O with 0.1% TFA over 20 minutes.

| Compound                               | Retention time (min) |
|----------------------------------------|----------------------|
| 4-Methoxybenzoic acid                  | 11.4                 |
| 4-Hydroxybenzoic acid                  | 5.8                  |
| 4-Methylthiobenzoic acid               | 13.6                 |
| 4-Methylsulfinylbenzoic acid           | 4.7                  |
| 4-Mercaptobenzoic acid                 | 12.5                 |
| 4-Methylsulfonylbenzoic acid (sulfone) | 6.9                  |
| 4-Ethylthiobenzoic acid                | 15.5                 |
| 4-Ethylsulfinylbenzoic acid            | 5.7                  |
| 9-Hydroxyfluorene (internal standard)  | 15.7                 |

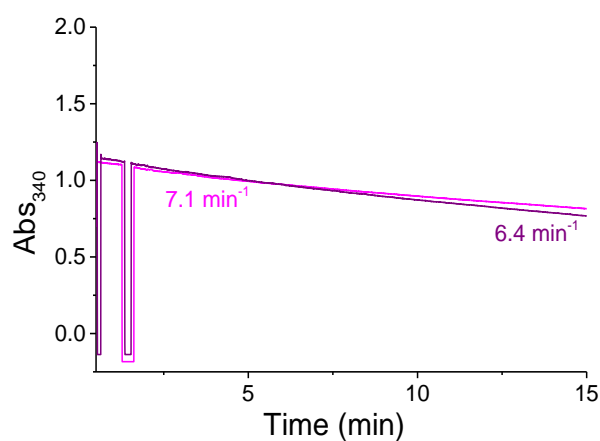

**Figure S8.** Rates of NADH consumption by the T252E<sub>CYP199A4</sub> mutant with the *para*-substituted benzoic acid substrates 4-methylthiobenzoic acid (**magenta**) and 4-ethylthiobenzoic acid (**purple**).



## Co-elution of reaction products with authentic compounds to confirm their identity

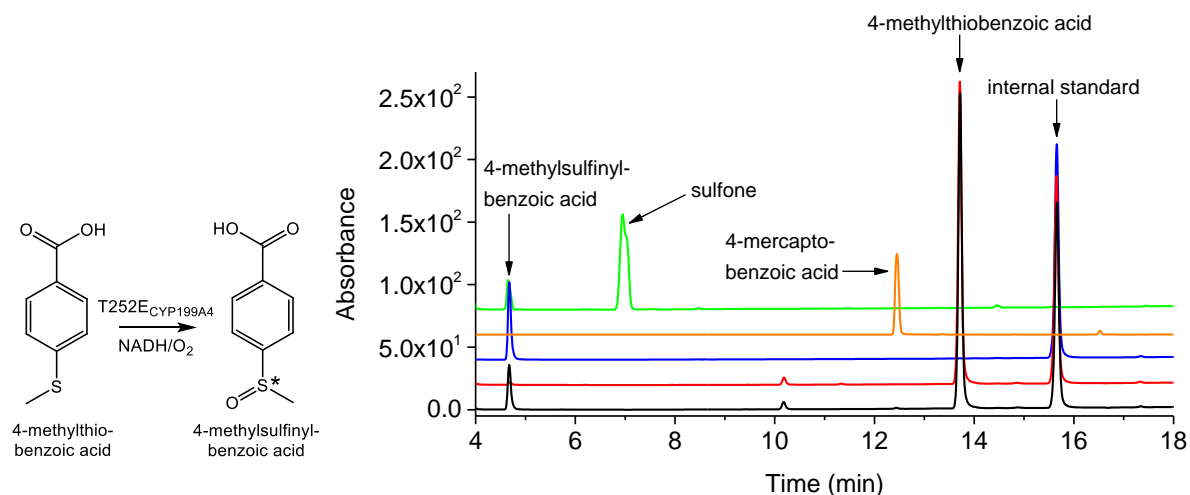

**Figure S9.** HPLC analysis of the NADH/O<sub>2</sub>-driven oxidation of 4-methylthiobenzoic acid by T252E<sub>CYP199A4</sub> (**black**), which exclusively generated 4-methylsulfinylbenzoic acid. In **red** is a control reaction omitting the P450, and in **blue** is authentic 4-methylsulfinylbenzoic acid (RT = 4.7 min). In **orange** is authentic 4-mercaptobenzoic acid (RT = 12.5 min) and in **green** is authentic 4-methylsulfonylbenzoic acid (RT = 6.9 min); the dealkylation product and sulfone were not formed by the T252E enzyme. No 4-sulfo benzoic acid was detected. The substrate appears at 13.6 min. Gradient: 20-95% MeCN in H<sub>2</sub>O with 0.1% TFA. Detection wavelength: 254 nm.

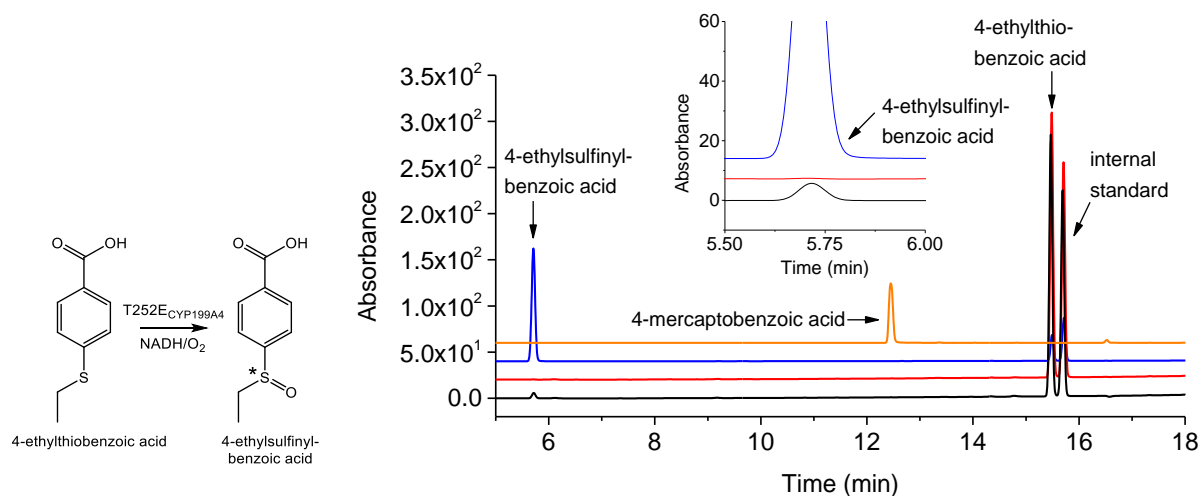

**Figure S10.** HPLC analysis of the NADH/O<sub>2</sub>-driven oxidation of 4-ethylthiobenzoic acid by T252E<sub>CYP199A4</sub> (**black**). In **red** is a control reaction omitting the P450, and in **blue** is chemically synthesized 4-ethylsulfinylbenzoic acid (RT = 5.7 min). The substrate appears at 15.5 min. Gradient: 20-95% MeCN in H<sub>2</sub>O with 0.1% TFA. Detection wavelength: 254 nm.

## H<sub>2</sub>O<sub>2</sub>-driven oxidation of 4-methylthiobenzoic acid by T252E<sub>CYP199A4</sub>

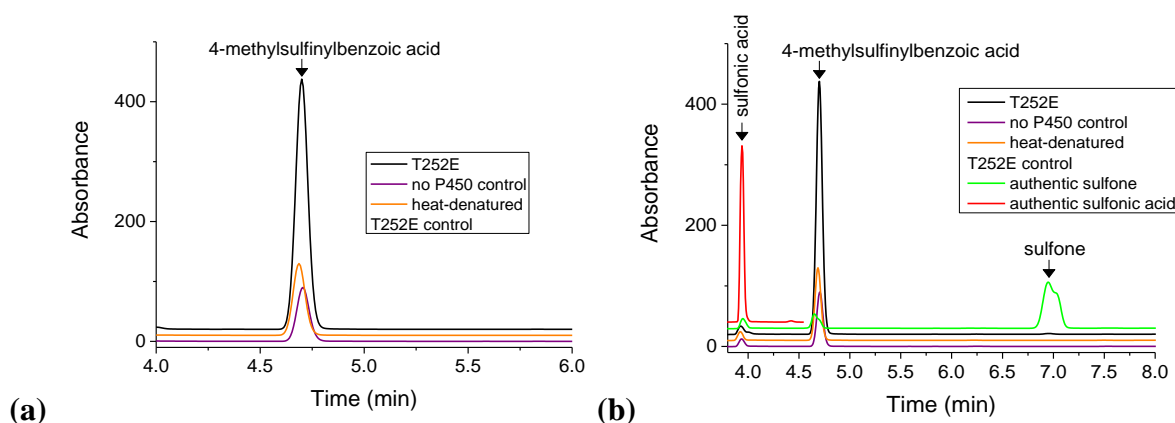

**Figure 11.** (a) Sulfoxidation of 4-methylthiobenzoic acid by the T252E mutant over a 20-minute period. H<sub>2</sub>O<sub>2</sub> (50 mM) was used as the oxygen donor. The **black line** is the T252E turnover. In **orange** is the heat-denatured T252E control, and in **purple** is the no P450 control. (b) In **red** and **green** are authentic 4-sulfobenzoic acid and 4-methylsulfonylbenzoic acid; these products were not formed by the T252E enzyme.

**Table S3a.** Product generated by the T252E mutant utilizing the H<sub>2</sub>O<sub>2</sub>-shunt pathway during 20 min reactions. The values given are mean  $\pm$  SD, with  $n \geq 2$ .

| Substrate       | Product concentration ( $\mu\text{M}$ ) | Average product formation rate over 20-min period ( $\mu\text{M} (\mu\text{M-P450})^{-1} \text{min}^{-1}$ ) |
|-----------------|-----------------------------------------|-------------------------------------------------------------------------------------------------------------|
| BA benzoic acid |                                         |                                                                                                             |
| 4-methoxyBA     | $114 \pm 2$                             | 1.9                                                                                                         |
| 4-methylthioBA  | $245 \pm 2^a$                           | 4.1                                                                                                         |

**Table S3b.** Sulfoxide concentration in the T252E turnover, no P450 control and heat-denatured T252E control reactions. H<sub>2</sub>O<sub>2</sub> (50 mM) was used as the oxygen donor and the reaction time was 20 minutes.

| Substrate      | Product concentration ( $\mu\text{M}$ ) |                 |                      |
|----------------|-----------------------------------------|-----------------|----------------------|
|                | T252E turnover                          | no P450 control | heat-denatured T252E |
| 4-methylthioBA | $311 \pm 2$                             | $66 \pm 1$      | 86                   |

<sup>a</sup> The 4-methylsulfinylbenzoic acid concentration in the reaction mixture was  $311 \pm 2 \mu\text{M}$  and the product concentration in the no P450 control was  $66 \pm 1$ . Note that the amount of product detected in the no P450 control reactions has been subtracted from the amount of product in the T252E turnovers.

**Control reactions to assess whether a Fenton-type reaction is responsible for the formation of product in the H<sub>2</sub>O<sub>2</sub>-driven reactions**

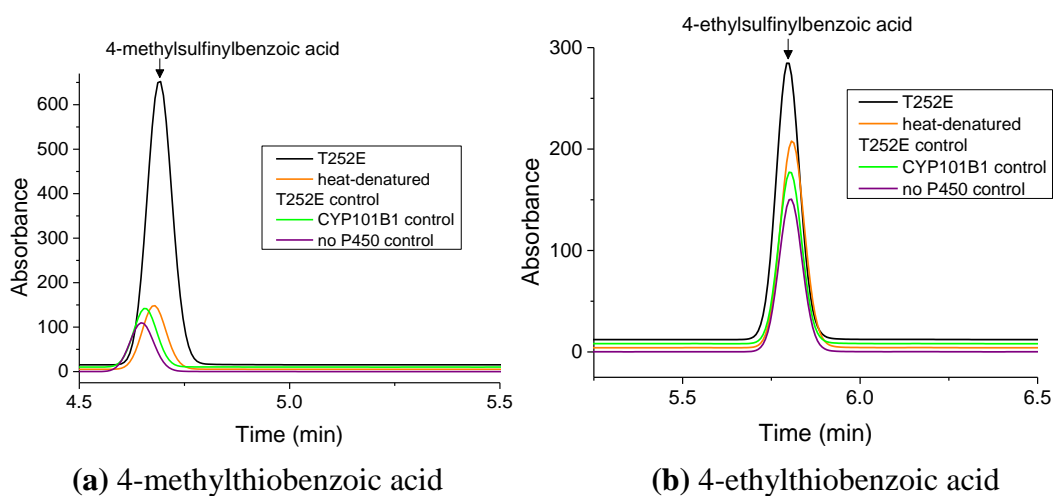

**Figure S12.** Comparison of the amount of product generated in the H<sub>2</sub>O<sub>2</sub>-driven T252E reactions (**black**) to the amount of product detected in the CYP101B1 control (**green**) and heat-denatured T252E control (**orange**) reactions. **The reaction time was 240 min.** The H<sub>2</sub>O<sub>2</sub> concentration was 6 mM for the sulfide substrates.

**Table S4.** Amount of product detected in the no P450 control, CYP101B1 control and heat-denatured T252E control reactions **after 240-min reactions.** \*For the thioether reactions, 6 mM H<sub>2</sub>O<sub>2</sub> was used instead of 50 mM H<sub>2</sub>O<sub>2</sub>.

| Substrate        | Product concentration (μM) |                  |                      |
|------------------|----------------------------|------------------|----------------------|
|                  | no P450 control            | CYP101B1 control | heat-denatured T252E |
| 4-methoxyBA      | 1                          | 1                | 1                    |
| 4-methylthioBA * | 91                         | 92               | 107                  |
| 4-ethylthioBA *  | 115                        | 130              | 161                  |

## HPLC analysis of product formation by CYP199A4 isoforms driven by H<sub>2</sub>O<sub>2</sub>

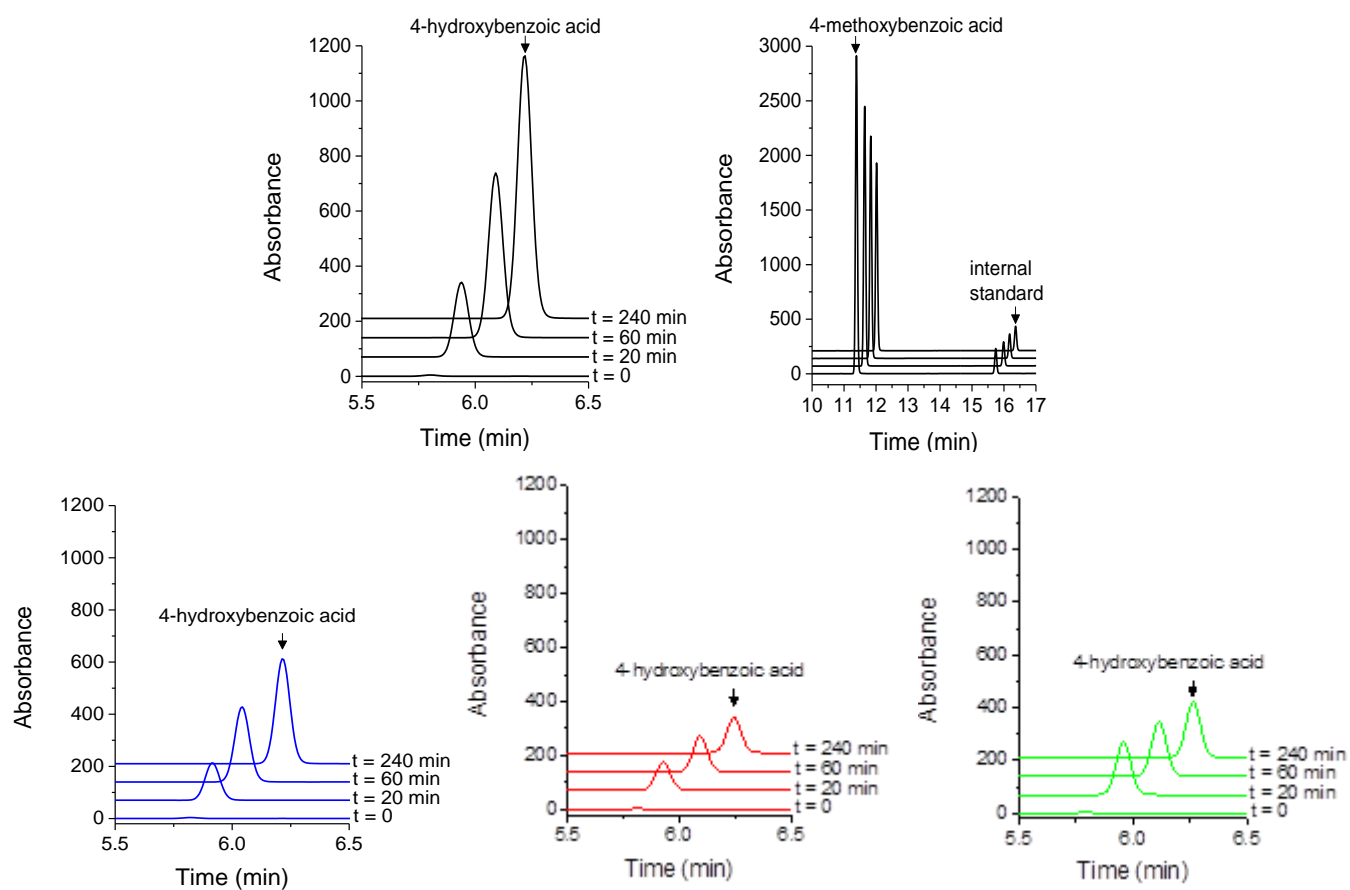

**Figure S13.** Conversion of 4-methoxybenzoic acid into 4-hydroxybenzoic acid by WT CP199A4 (**blue**) and the T252E (**black**), D251N (**red**) and T252A (**green**) mutants over a 4-hour period. H<sub>2</sub>O<sub>2</sub> (50 mM) was used as the oxygen donor.

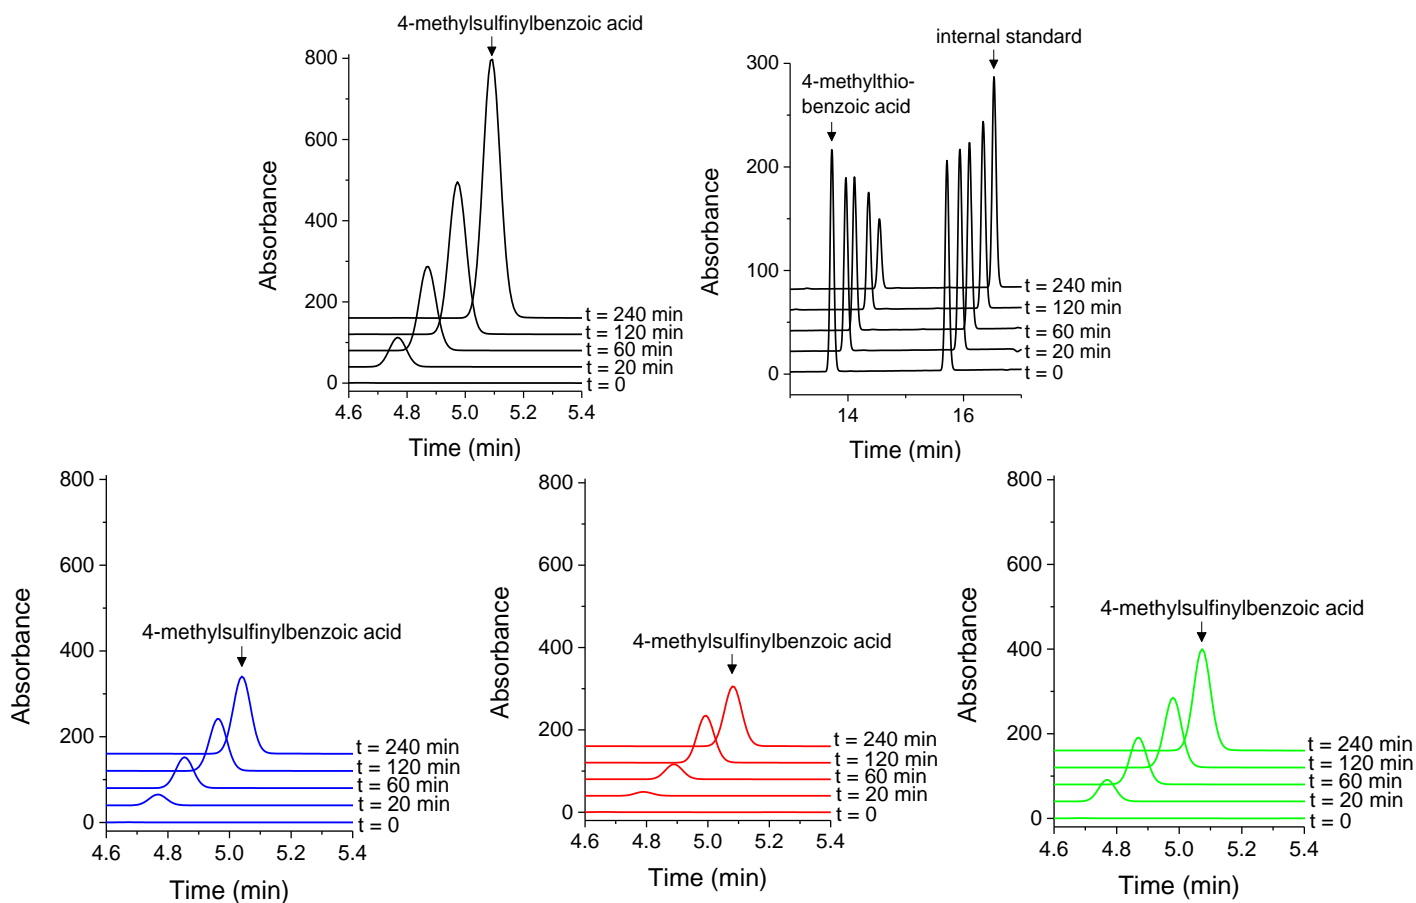

**Figure S14.** Conversion of 4-methylthiobenzoic acid into 4-methylsulfinylbenzoic acid by WT CP199A4 (**blue**) and the T252E (**black**), D251N (**red**) and T252A (**green**) mutants over a 4-hour period.  $\text{H}_2\text{O}_2$  (6 mM) was used as the oxygen donor.

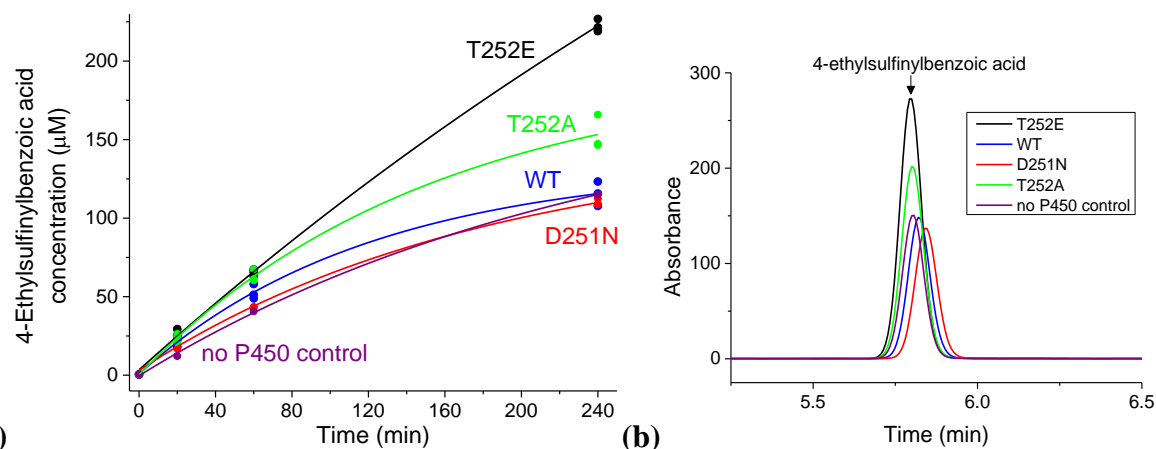

**Figure S15. (a)** Time course of 4-ethylthiobenzoic acid conversion into the corresponding sulfoxide by CYP199A4 isoforms. **(b)** HPLC analysis of the amount of the 4-ethylsulfinylbenzoic acid product (RT = 5.8 min) generated by the CYP199A4 isoforms over 240 minutes.

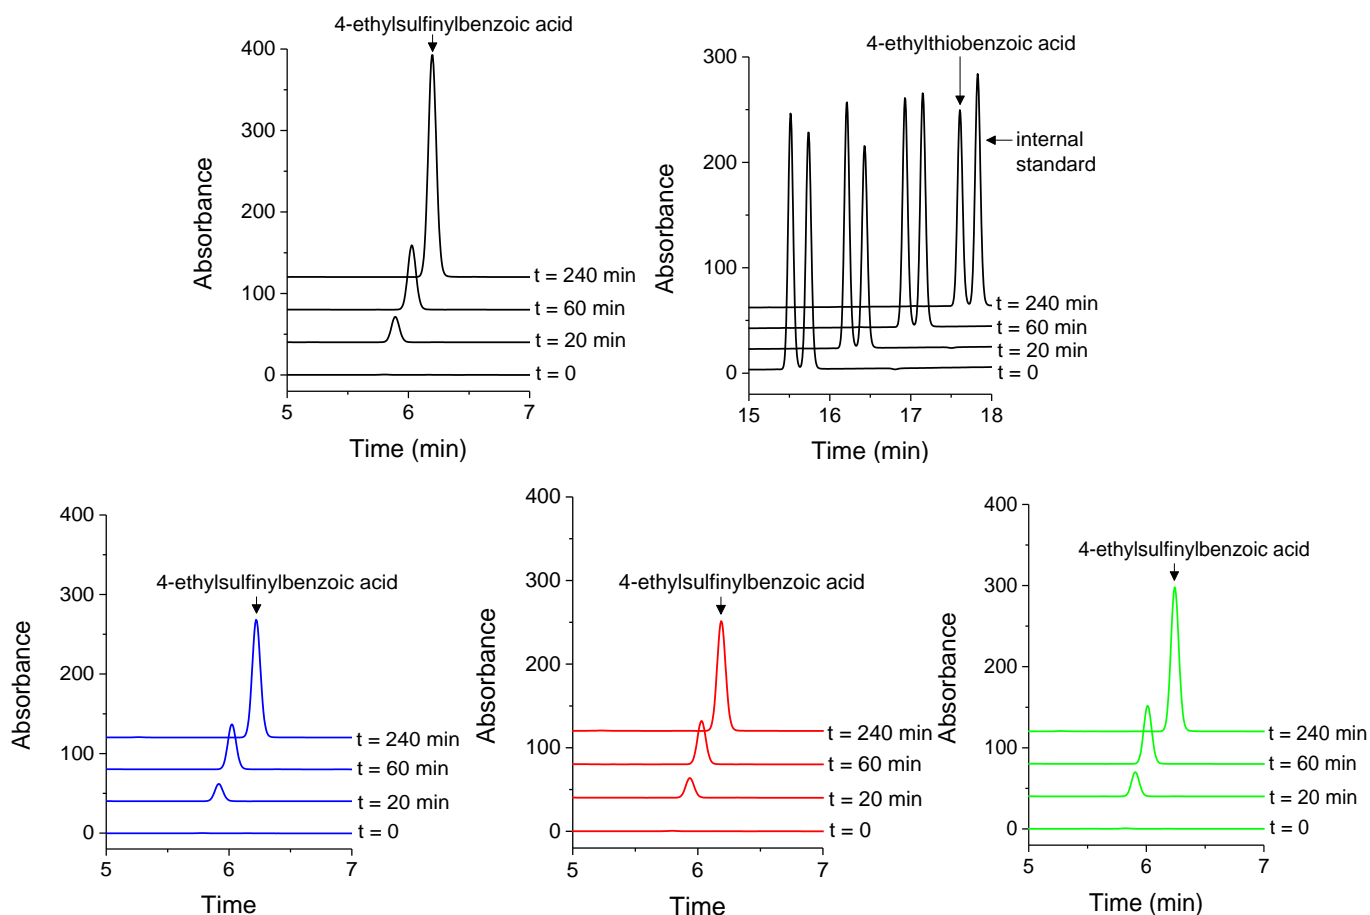

**Figure S15. (b)** Conversion of 4-ethylthiobenzoic acid into 4-ethylsulfinylbenzoic acid by WT CP199A4 (blue) and the T252E (black), D251N (red) and T252A (green) mutants over a 4-hour period.  $\text{H}_2\text{O}_2$  (6 mM) was used as the oxygen donor. No 4-mercaptobenzoic acid was detected.

**Table S5.** Data collection, processing and refinement statistics for the crystal structures of the T252E mutant of CYP199A4 in complex with benzoic acid substrates.

|                                                   | <b>T252E<sub>CYP199A4</sub> + 4-methylthiobenzoic acid</b> | <b>T252E<sub>CYP199A4</sub> + 4-ethylthiobenzoic acid</b> |
|---------------------------------------------------|------------------------------------------------------------|-----------------------------------------------------------|
| <b>PDB code</b>                                   | 7TP6                                                       | 7TP5                                                      |
| <b>X-ray wavelength (Å)</b>                       | 0.95370                                                    | 0.95370                                                   |
| <b>Unit cell parameters (Å/°)</b>                 | <i>a</i> = 41.1                                            | <i>a</i> = 40.7                                           |
|                                                   | <i>b</i> = 51.8                                            | <i>b</i> = 51.5                                           |
|                                                   | <i>c</i> = 80.0                                            | <i>c</i> = 79.3                                           |
|                                                   | $\alpha$ = 90.0                                            | $\alpha$ = 90.0                                           |
|                                                   | $\beta$ = 92.3                                             | $\beta$ = 92.3                                            |
| <b>Space group</b>                                | P12 <sub>1</sub> 1                                         | P12 <sub>1</sub> 1                                        |
| <b>Molecules per asymmetric unit</b>              | 1                                                          | 1                                                         |
| <b>Resolution range (Å)</b>                       | 43.46 – 1.66                                               | 40.70 – 1.66                                              |
|                                                   | (1.68 – 1.66)                                              | (1.68 – 1.66)                                             |
| <b>&lt;I/σ(I)&gt;</b>                             | 7.4 (1.6)                                                  | 9.3 (1.0)                                                 |
| <b>Unique reflections</b>                         | 38747                                                      | 31873                                                     |
| <b>Completeness of data</b>                       | 96.3 (90.4)                                                | 81.1 (73.3)                                               |
| <b>Multiplicity</b>                               | 6.1 (5.1)                                                  | 5.0 (4.3)                                                 |
| <b>R<sub>merge</sub> (all I+ and I-) (%)</b>      | 16.7 (93.0)                                                | 14.5 (152.1)                                              |
| <b>R<sub>pim</sub> (all I+ and I-) (%)</b>        | 7.1 (44.0)                                                 | 6.7 (76.3)                                                |
| <b>CC<sub>1/2</sub></b>                           | 99.1 (61.8)                                                | 99.4 (37.6)                                               |
| <b>R<sub>work</sub> (%)</b>                       | 19.13                                                      | 16.62                                                     |
| <b>R<sub>free</sub> (5% held) (%)</b>             | 22.88                                                      | 20.19                                                     |
| <b>Ramachandran plot (%)</b>                      |                                                            |                                                           |
| <b>Most favored</b>                               | 98.21                                                      | 97.95                                                     |
| <b>Allowed</b>                                    | 1.79                                                       | 2.05                                                      |
| <b>Outliers</b>                                   | 0                                                          | 0                                                         |
| <b>Unusual rotamers (%)</b>                       | 0.31                                                       | 0.31                                                      |
| <b>RMSD bond angles (°)</b>                       | 0.828                                                      | 0.736                                                     |
| <b>RMSD bond lengths (Å)</b>                      | 0.006                                                      | 0.004                                                     |
| <b>Omit map type, contour level, carve radius</b> | composite omit map, 1.5 σ, 1.5 Å carve                     | feature-enhanced map, 1.0 σ, 1.5 Å carve                  |

Values in parentheses correspond to the highest resolution (outer) shell.

## Overlay of substrate-bound T252E and WT CYP199A4 structures

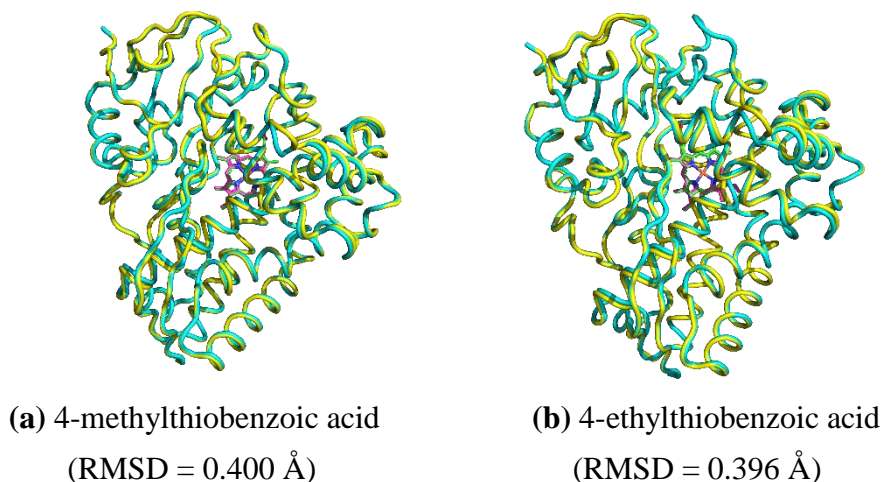

**Figure S16.** Overlaid structures ( $C\alpha$  traces) of the T252E mutant (yellow cartoon, magenta heme) and WT CYP199A4 (blue cartoon, green heme) with various ligands bound. The RMSD between the  $C\alpha$  atoms is given below each figure (over all 393 pairs). The PDB codes are: 7TP6, 5KT1, 7TP5, and 5U6U.

## T252E<sub>CYP199A4</sub> chloride binding sites

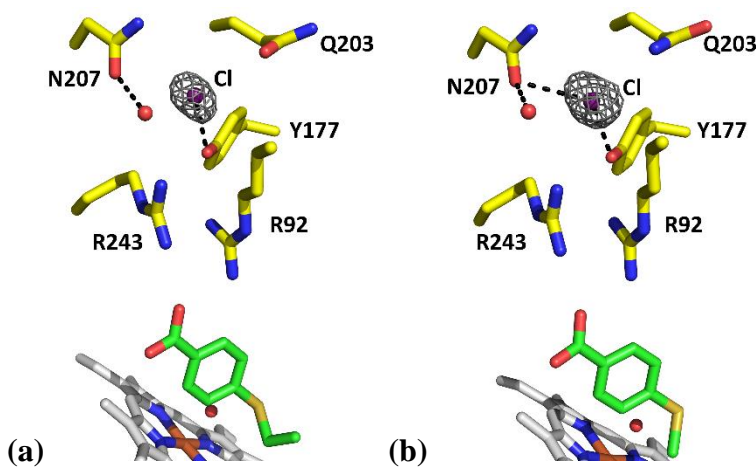

**Figure S17.** Chloride binding site of the T252E mutant of CYP199A4 in complex with (a) 4-ethylthioBA and (b) 4-methylthioBA. A  $2mF_o-DF_c$  composite omit map of the chloride ion (purple sphere) is shown as gray mesh contoured at  $1.0 \sigma$  ( $1.5 \text{ \AA}$  carve). The PDB codes are 7TP5 and 7TP6.



**Table S6.** Distances and angles between notable features of the 4-methylthio- and 4-ethylthio-benzoate-bound T252E crystal structures. Values are also given for the WT structures for comparison (PDB: 5KT1 and PDB: 5U6U, respectively).<sup>27</sup> The ferryl oxygen of Cpd I was modelled 1.62 Å above the iron (along the axis defined by the Fe-S bond).

| Distance                                                            | 4-methylthioBA-bound<br>T252E <sub>CYP199A4</sub><br>(7TP6) | 4-methylthioBA-bound<br>WT <sub>CYP199A4</sub><br>(5KT1) | 4-ethylthioBA-bound<br>T252E <sub>CYP199A4</sub><br>(7TP5) | 4-ethylthioBA-bound<br>WT <sub>CYP199A4</sub><br>(5U6U) |
|---------------------------------------------------------------------|-------------------------------------------------------------|----------------------------------------------------------|------------------------------------------------------------|---------------------------------------------------------|
| Fe - OH <sub>2</sub> /OH <sup>-</sup> ligand                        | 2.2                                                         | Not present                                              | 2.1                                                        | Not present                                             |
| Fe - C358 S $\gamma$                                                | 2.3                                                         | 2.5                                                      | 2.3                                                        | 2.4                                                     |
| Fe - C <sub>01</sub>                                                | 4.8                                                         | 4.5                                                      | 5.4                                                        | 5.2                                                     |
| Fe - C <sub>02</sub>                                                | -                                                           | -                                                        | 6.9                                                        | 6.7                                                     |
| Fe - S                                                              | 5.1                                                         | 5.0                                                      | 4.9                                                        | 4.8                                                     |
| Fe - closest O of E252                                              | 4.4                                                         | -                                                        | 4.3                                                        | -                                                       |
| OH <sub>2</sub> /OH <sup>-</sup> ligand –<br>closest O of E252      | 2.7                                                         | -                                                        | 2.7                                                        | -                                                       |
| OH <sub>2</sub> /OH <sup>-</sup> ligand - C <sub>01</sub>           | 3.6                                                         | -                                                        | 4.2                                                        | -                                                       |
| OH <sub>2</sub> /OH <sup>-</sup> ligand - S                         | 3.3                                                         | -                                                        | 3.1                                                        | -                                                       |
| C <sub>01</sub> - O=Fe                                              | 3.6                                                         | 3.3                                                      | 4.3                                                        | 4.1                                                     |
| S - O=Fe                                                            | 3.6                                                         | 3.4                                                      | 3.4                                                        | 3.3                                                     |
| <b>Angles (°)</b>                                                   |                                                             |                                                          |                                                            |                                                         |
| Fe=O-C <sub>01</sub>                                                | 125.4                                                       | 131.9                                                    | 126.3                                                      | 127.0                                                   |
| Fe=O-S                                                              | 154.0                                                       | 162.5                                                    | 150.0                                                      | 152.0                                                   |
| Dihedral (C <sub>01</sub> -S-C <sub>03</sub> -<br>C <sub>04</sub> ) | -31.8                                                       | -33.9                                                    | -59.4                                                      | -55.2                                                   |
| C <sub>01</sub> -S-C <sub>03</sub>                                  | 101.7                                                       | 104.3                                                    | 105.2                                                      | 106.1                                                   |
| <b>Refined occupancies</b>                                          |                                                             |                                                          |                                                            |                                                         |
| 4-MethylthioBA/4-<br>EthylthioBA substrate                          | 96%                                                         |                                                          | 100%                                                       |                                                         |
| OH <sub>2</sub> /OH <sup>-</sup> ligand                             | 80%                                                         | Not present                                              | 100%                                                       | Not present                                             |

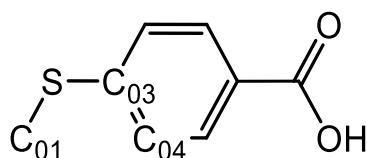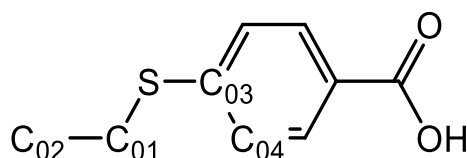

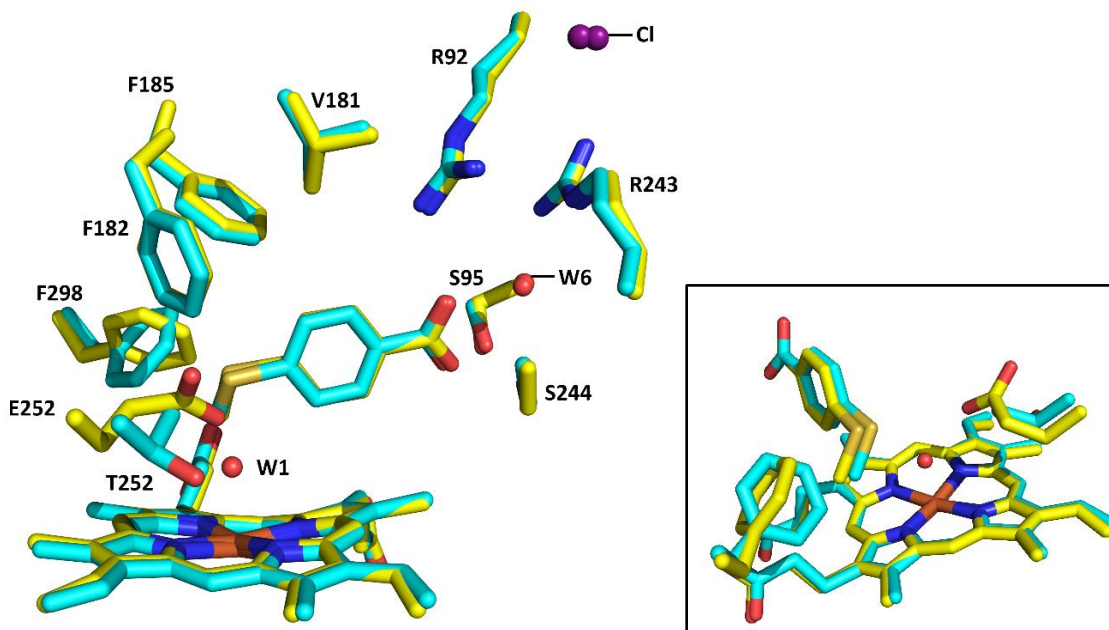

**Figure S18a.** Overlaid structures of WT (cyan; PDB ID: 5KT1) and T252E CYP199A4 (yellow; PDB code: 7TP6) with 4-methylthiobenzoate bound. The waters and chloride in the T252E structure are labeled.

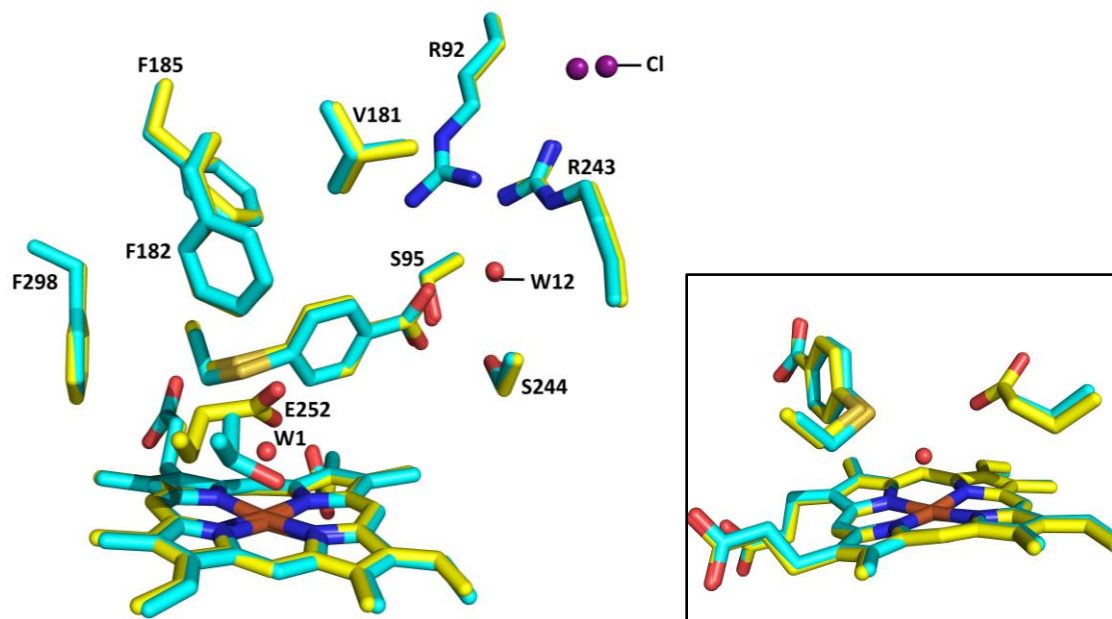

**Figure S18b.** Overlaid structures of WT (cyan; PDB ID: 5U6U) and T252E CYP199A4 (yellow; PDB code: 7TP5) with 4-ethylthiobenzoate bound. The waters and chloride in the T252E structure are labeled. The inset shows the binding orientation of 4-ethylthiobenzoic acid in the active site of each enzyme in more detail.

### F298 conformation in the crystal structures of WT and T252E CYP199A4 bound to 4-methylthiobenzoic acid

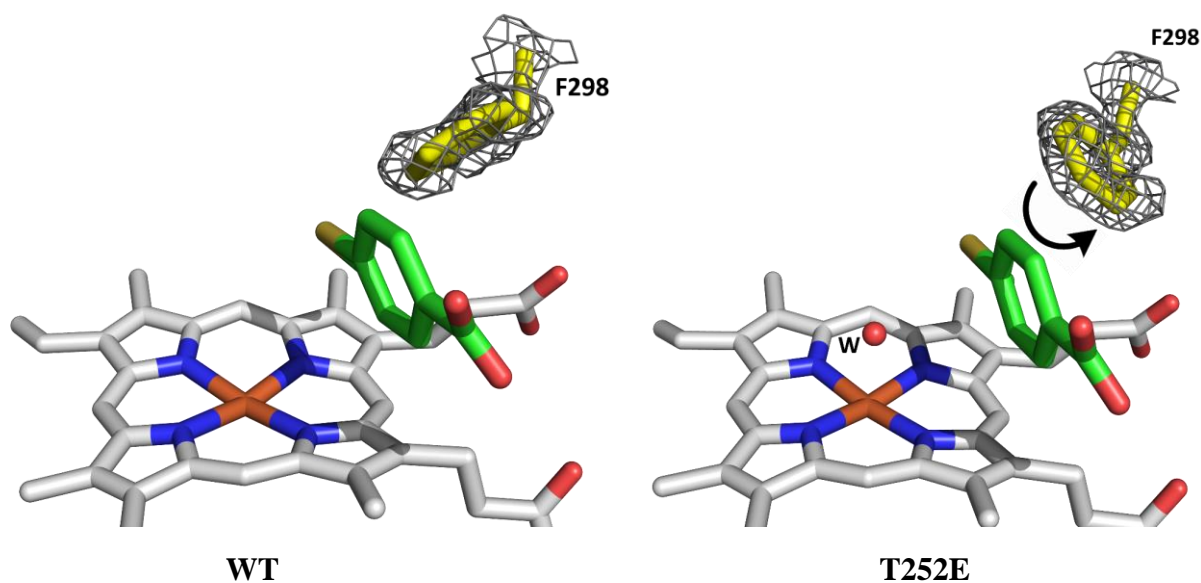

**Figure S19a.** Comparison of the F298 conformation in the crystal structures of WT and T252E CYP199A4 bound to 4-methylthiobenzoic acid. In the T252E structure, the F298 side chain is rotated (movement described by the black arrow). A  $2mF_o-DF_c$  feature-enhanced map of the F298 residue is shown as gray mesh contoured at  $1.0 \sigma$  ( $1.5\text{-\AA}$  carve).

The T252→E mutation altered the structure of the *I*-helix, including the position of the D251 and N255 residues.

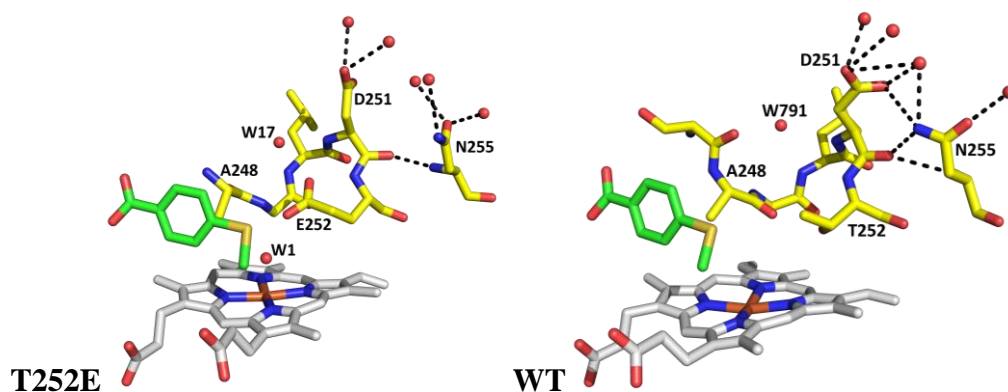

**Figure S19b.** Comparison of the oxygen-binding groove of T252E<sub>CYP199A4</sub> bound to 4-methylthiobenzoic acid (PDB code: 7TP6) and WT<sub>CYP199A4</sub> bound to 4-methylthiobenzoic acid (PDB code: 5KT1).

**Table S7.** Crystallographic data collection, processing and refinement statistic for the crystal structures of D251N<sub>CYP199A4</sub> and T252A<sub>CYP199A4</sub> in complex with 4-methylthiobenzoic acid. The space group is P12<sub>1</sub>1.

|                                                   | <b>D251N<sub>CYP199A4</sub> + 4-methylthiobenzoic acid</b> | <b>T252A<sub>CYP199A4</sub> + 4-methylthiobenzoic acid</b> |
|---------------------------------------------------|------------------------------------------------------------|------------------------------------------------------------|
| <b>PDB code</b>                                   | 7TQM                                                       | 8DYB                                                       |
| <b>X-ray wavelength (Å)</b>                       | 0.95373                                                    | 0.95370                                                    |
| <b>Unit cell parameters (Å/°)</b>                 | <i>a</i> = 44.54                                           | <i>a</i> = 38.91                                           |
|                                                   | <i>b</i> = 51.36                                           | <i>b</i> = 50.94                                           |
|                                                   | <i>c</i> = 79.05                                           | <i>c</i> = 78.71                                           |
|                                                   | $\alpha$ = 90.00                                           | $\alpha$ = 90.00                                           |
|                                                   | $\beta$ = 92.32                                            | $\beta$ = 94.36                                            |
|                                                   | $\gamma$ = 90.00                                           | $\gamma$ = 90.00                                           |
|                                                   | <b>Space group</b>                                         | P12 <sub>1</sub> 1                                         |
| <b>Molecules per asymmetric unit</b>              | 1                                                          | 1                                                          |
| <b>Resolution range (Å)</b>                       | 44.50-1.44<br>(1.46 - 1.44)                                | 42.73-1.88<br>(1.92 - 1.88)                                |
| <b>&lt;I/σ(I)&gt;</b>                             | 8.0 (0.9)                                                  | 11.4 (1.7)                                                 |
| <b>Unique reflections</b>                         | 64061                                                      | 25053 (1503)                                               |
| <b>Completeness of data</b>                       | 98.7 (90.0)                                                | 99.3 (93.7)                                                |
| <b>Multiplicity</b>                               | 6.9 (6.4)                                                  | 7.5 (6.9)                                                  |
| <b>R<sub>merge</sub> (all I+ and I-) (%)</b>      | 11.3 (169.8)                                               | 10.7 (93.1)                                                |
| <b>R<sub>pim</sub> (all I+ and I-) (%)</b>        | 4.6 (71.3)                                                 | 4.2 (37.2)                                                 |
| <b>CC<sub>1/2</sub></b>                           | 99.8 (64.0)                                                | 99.9 (72.4)                                                |
| <b>R<sub>work</sub> (%)</b>                       | 18.06                                                      | 22.57                                                      |
| <b>R<sub>free</sub> (5% held) (%)</b>             | 20.48                                                      | 26.21                                                      |
| <b>Ramachandran plot (%)</b>                      |                                                            |                                                            |
| <b>Most favored</b>                               | 97.95                                                      | 96.68                                                      |
| <b>Allowed</b>                                    | 2.05                                                       | 2.81                                                       |
| <b>Outliers</b>                                   | 0                                                          | 0.51                                                       |
| <b>Unusual rotamers (%)</b>                       | 0.91                                                       | 1.25                                                       |
| <b>RMSD bond angles (°)</b>                       | 0.797                                                      | 0.713                                                      |
| <b>RMSD bond lengths (Å)</b>                      | 0.006                                                      | 0.004                                                      |
| <b>Omit map type, contour level, carve radius</b> | feature-enhanced map, 1.0 $\sigma$ ,<br>1.5 Å carve        | feature-enhanced map,<br>1.0 $\sigma$ , 1.5 Å carve        |

Values in parentheses correspond to the highest-resolution (outer) shell.

### Overlay of substrate-bound T252A and WT CYP199A4 structures

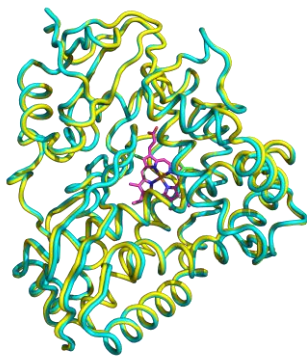

RMSD = 0.437 Å

**Figure S20.** Overlaid  $C\alpha$  traces of WT CYP199A4 (blue cartoon, green heme; PDB code: 5KT1) and the T252A mutant (yellow cartoon, magenta heme) bound to 4-methylthiobenzoic acid. The RMSD between  $C\alpha$  atoms is 0.437 Å (over all 393 pairs).

### Overlay of substrate-bound D251N and WT CYP199A4 structures

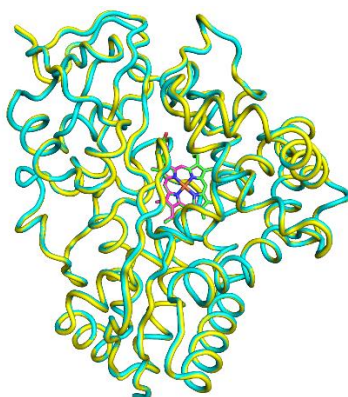

RMSD = 0.167 Å

**Figure S21.** Overlaid  $C\alpha$  traces of WT CYP199A4 (blue cartoon, green heme; PDB code: 5KT1) and the D251N mutant (yellow cartoon, magenta heme; PDB code: 7TQM) bound to 4-methylthiobenzoic acid. The RMSD between  $C\alpha$  atoms is 0.167 Å (over all 393 pairs).

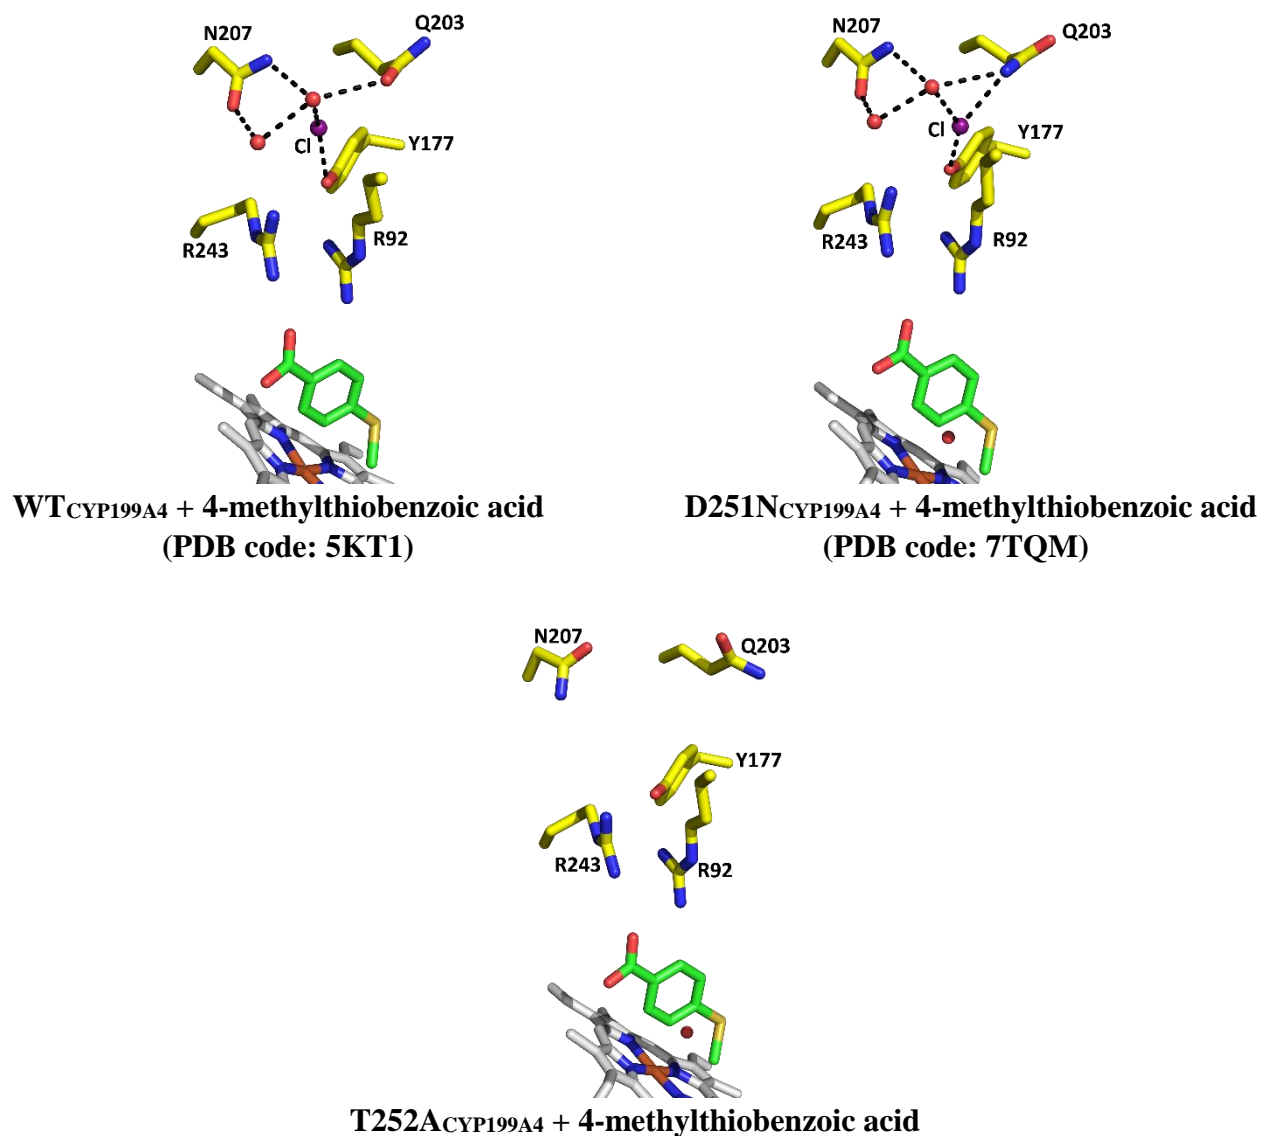

**Figure S22.** The chloride binding site of WT<sub>CYP199A4</sub>, D251N<sub>CYP199A4</sub> and T252A<sub>CYP199A4</sub> with 4-methylthiobenzoic acid bound. Note that no chloride ion has been modeled in the T252A crystal structure (there does not appear to be electron density at this position).

**Table S8.** Distances and angles in the crystal structures of 4-methylthiobenzoic acid-bound D251N<sub>CYP199A4</sub> and T252A<sub>CYP199A4</sub>. Distances are also given for the equivalent WT<sub>CYP199A4</sub> structure for comparison (PDB code: 5KT1). The ferryl oxygen of Cpd I was modeled 1.62 Å above the iron (along the axis defined by the Fe-S bond). In the table, “W” refers to the heme-bound aqua ligand.

| Distance (Å)                                                       | 4-methylthioBA-bound<br>D251N <sub>CYP199A4</sub><br>(7TQM) | 4-methylthioBA-bound<br>T252A <sub>CYP199A4</sub> | 4-methylthioBA-bound<br>WT <sub>CYP199A4</sub> (5KT1) |
|--------------------------------------------------------------------|-------------------------------------------------------------|---------------------------------------------------|-------------------------------------------------------|
| Fe – W                                                             | 2.3                                                         | 2.5                                               | Not present                                           |
| Fe - C358 S <sub>γ</sub>                                           | 2.3                                                         | 2.6                                               | 2.5                                                   |
| W - S                                                              | 3.3                                                         | 3.3                                               | Not present                                           |
| W - C <sub>01</sub>                                                | 3.6                                                         | 3.3                                               | Not present                                           |
| Fe - C <sub>01</sub>                                               | 4.6                                                         | 4.2                                               | 4.5                                                   |
| Fe - S                                                             | 5.1                                                         | 5.1                                               | 5.0                                                   |
| C <sub>01</sub> - O=Fe                                             | 3.5                                                         | 3.1                                               | 3.3                                                   |
| S - O=Fe                                                           | 3.6                                                         | 3.6                                               | 3.4                                                   |
| <b>Angles (°)</b>                                                  |                                                             |                                                   |                                                       |
| Fe=O-C <sub>01</sub>                                               | 122.3                                                       | 123.4                                             | 131.9                                                 |
| Fe=O-S                                                             | 151.7                                                       | 153.2                                             | 162.5                                                 |
| Dihedral<br>(C <sub>01</sub> -S-C <sub>03</sub> -C <sub>04</sub> ) | -24.49                                                      | -20.96                                            | -33.86                                                |
| C <sub>01</sub> -S-C <sub>03</sub>                                 | 106.2                                                       | 106.2                                             | 104.3                                                 |
| <b>Refined occupancies (%)</b>                                     |                                                             |                                                   |                                                       |
| 4-MethylthioBA                                                     | 100%                                                        | 100%                                              |                                                       |
| Heme aqua ligand                                                   | W1 100%                                                     | W126 100%                                         | Not present                                           |

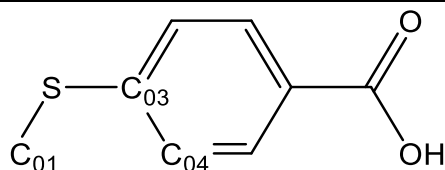

**Measured S-Fe-OH<sub>2</sub> angle in the crystal structures of D251N, T252A and T252E CYP199A4 with 4-methylthiobenzoic acid bound**

**Table S9.** Measured S<sub>Cys358</sub>-Fe-OH<sub>2</sub> angle and Fe-O distances in the crystal structures of D251N, T252A and T252E CYP199A4 in complex with 4-methylthiobenzoic acid. The S-Fe-O angle in the D251N and T252E structures is closer to 180° (linear) than in the T252A structure. The overall coordinate error of each structure is also provided.

| 4-methylthiobenzoic acid |                  |                      |                  |
|--------------------------|------------------|----------------------|------------------|
| CYP199A4 isoform         | S-Fe-O angle (°) | Fe-O bond length (Å) | coordinate error |
| D251N                    | 168.6            | 2.31 ± 0.08          | 0.17             |
| T252A                    | 163.6            | 2.46 ± 0.27          | 0.26             |
| T252E                    | 172.8            | 2.17 ± 0.12          | 0.21             |
| 4-ethylthiobenzoic acid  |                  |                      |                  |
| CYP199A4 isoform         | S-Fe-O angle (°) | Fe-O bond length (Å) | coordinate error |
| T252E                    | 174.3            | 2.14 ± 0.14          | 0.17             |

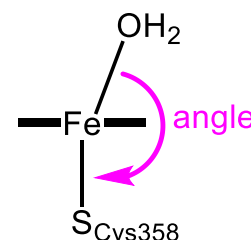

(a) T252A<sub>CYP199A4</sub> + 4-methylthiobenzoic acid

(b) T252E<sub>CYP199A4</sub> + 4-methylthiobenzoic acid

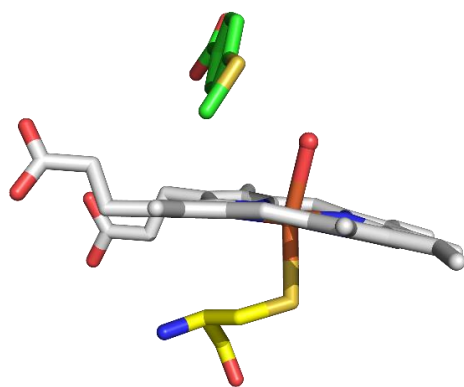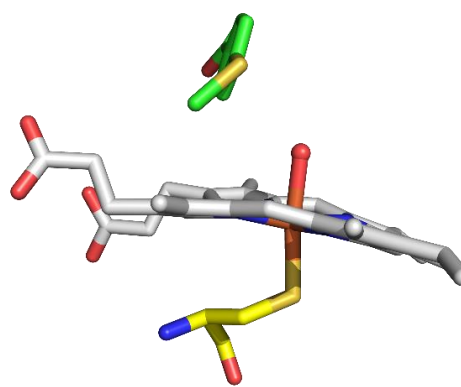

(c) D251N<sub>CYP199A4</sub> + 4-methylthiobenzoic acid

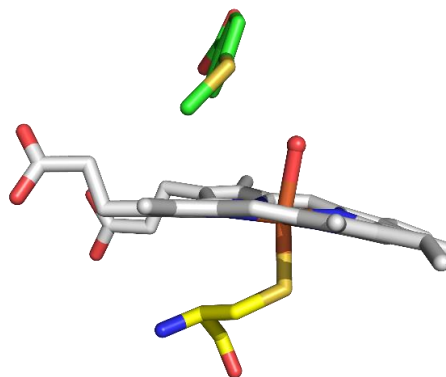

**Figure S23.** The S-Fe-O angle in the CYP199A4 mutant crystal structures with 4-methylthiobenzoic acid bound.



**Comparison of the S-Fe-OH<sub>2</sub> angle in crystal structures of CYP199A4 isoforms bound to 4-methylthiobenzoic acid**

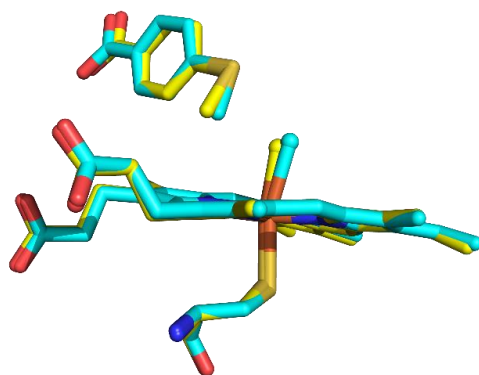

**(a)** Comparison of T252A (cyan) and D251N (yellow) structures

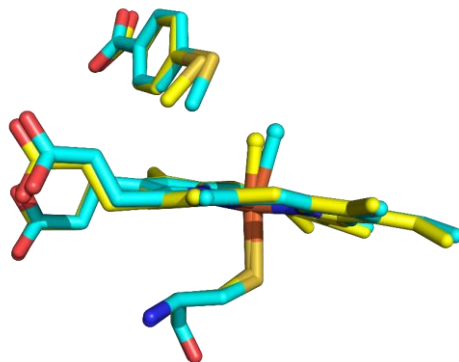

**(b)** Comparison of T252A (cyan) and T252E (yellow) structures

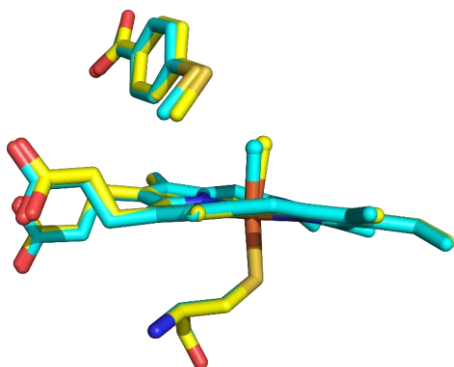

**(c)** Comparison of T252E (cyan) and D251N (yellow) structures

**Figure S24.** Comparison of the S-Fe-OH<sub>2</sub> angle in the crystal structures of T252A, D251N and T252E CYP199A4 bound to 4-methylthiobenzoic acid. The heme-bound water molecule is noticeably offset from the axis of the Fe-S bond in the T252A crystal structure. The Fe-O bond length is also longer in the T252A crystal structure (2.46 Å) than in the D251N (2.31 Å) or T252E (2.17 Å) structures.

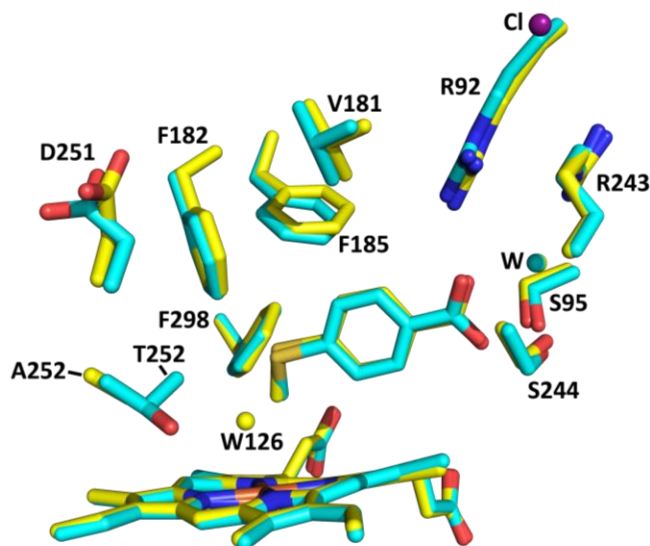

**Figure S25.** Overlaid structures of T252A<sub>CYP199A4</sub> (yellow) and WT<sub>CYP199A4</sub> (cyan; PDB code: 5KT1) in complex with 4-methylthiobenzoic acid. The chloride anion (purple sphere) in the WT structure is labeled. A heme-bound aqua ligand (W126) is only present in the T252A structure. The orientation of D251 differs in these two structures. (N255 also adopts a different conformation in the T252A structure). The position of the substrate in both structures is similar.

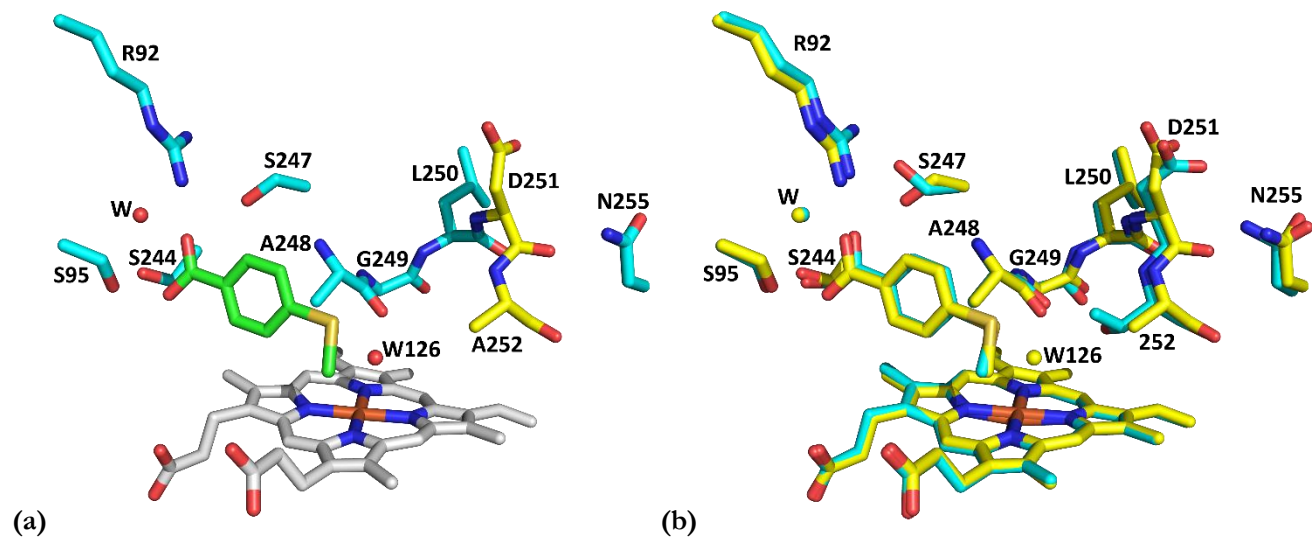

**Figure S26.** (a) The expanded active site of T252A<sub>CYP199A4</sub> bound to 4-methylthiobenzoic acid (green) including the oxygen binding groove. D251 and A252 are depicted in yellow. W126 is the heme-bound water ligand and is shown as a red sphere. (b) Overlaid crystal structures of T252A<sub>CYP199A4</sub> (yellow) and WT<sub>CYP199A4</sub> (cyan) bound to 4-methylthiobenzoic acid. Several active-site residues (e.g., D251, N255 and S247) have different orientations in the T252A structure. Waters are depicted as yellow or cyan spheres.

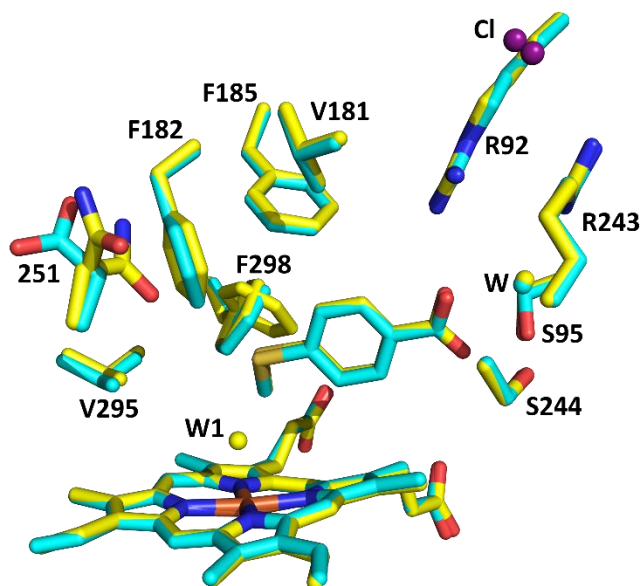

**Figure S27.** Overlaid crystal structures of 4-methylthiobenzoic acid-bound D251N<sub>CYP199A4</sub> (yellow; PDB code: 7TQM) and WT<sub>CYP199A4</sub> (cyan). In the WT structure (PDB code: 5KT1), the heme-bound water ligand has been expelled. The mutated residue (N251) and the side chain of F298 are shown in the two conformations in which they are present, see main text for details.

#### Overlaid crystal structures of D251N and T252E CYP199A4 bound to 4-methylthiobenzoic acid

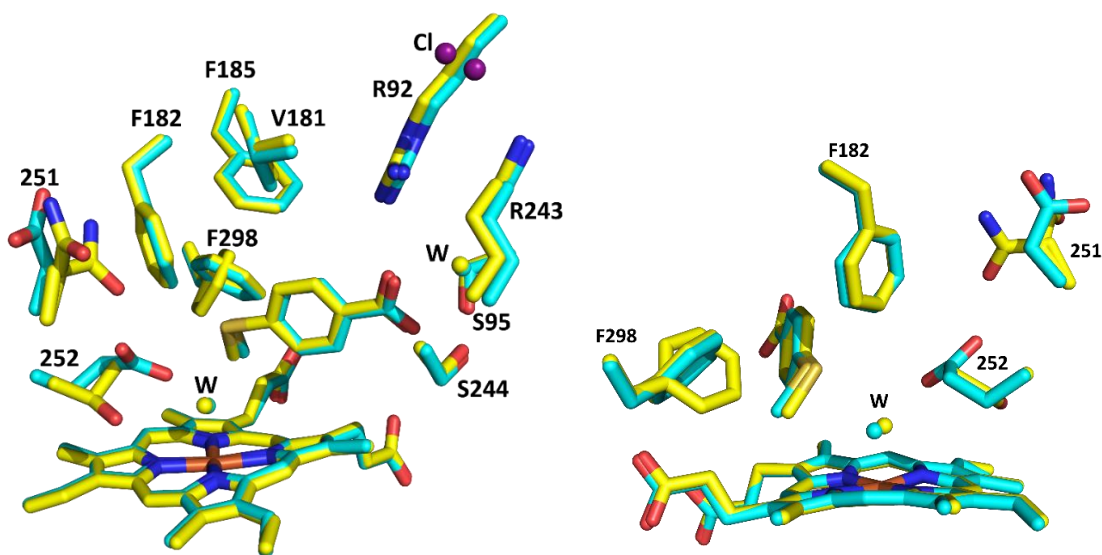

**Figure S28.** Overlaid crystal structures of 4-methylthiobenzoic acid-bound D251N<sub>CYP199A4</sub> (yellow; PDB code: 7TQM) and T252E<sub>CYP199A4</sub> (cyan; PDB code: 7TP6). In both structures there is a high-occupancy heme-bound aqua ligand (W) (100% and 80% occupancy). In the D251N structure, N251 and F298 are both present in two conformations.

## N251 and F298 conformations in the crystal structure of D251N<sub>CYP199A4</sub> bound to 4-methylthiobenzoic acid

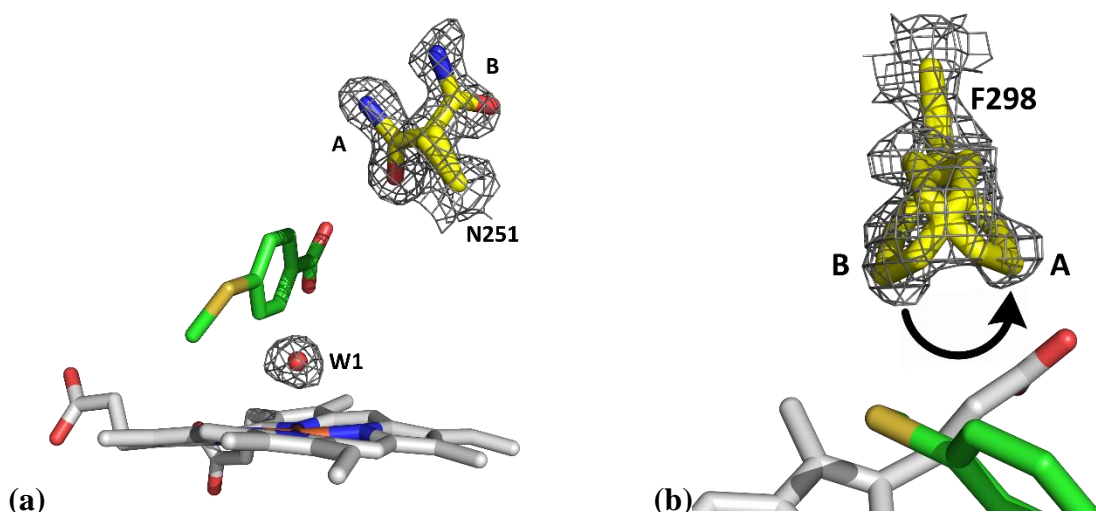

**Figure S29.** (a) In the 4-methylthiobenzoic acid-bound D251N<sub>CYP199A4</sub> crystal structure, N251 is present in two conformations. In one, the N251 side chain has rotated into the active site (conformation A; 60% occupancy). In the other, N251 points away from the active site, into the solvent channel (conformation B; 40% occupancy). A  $2mF_o-DF_c$  feature-enhanced map of N251 is shown as gray mesh contoured at  $1.0 \sigma$ . (b) F298 is present in two conformations (46% (A) and 54% (B) occupancy) which are related by rotation of the phenyl ring (black arrow). A  $2mF_o-DF_c$  feature-enhanced map of F298 is shown as gray mesh contoured at  $1.0 \sigma$ .

**Heme conformation in the crystal structures of CYP199A4 isoforms in complex with 4-methoxybenzoic acid**

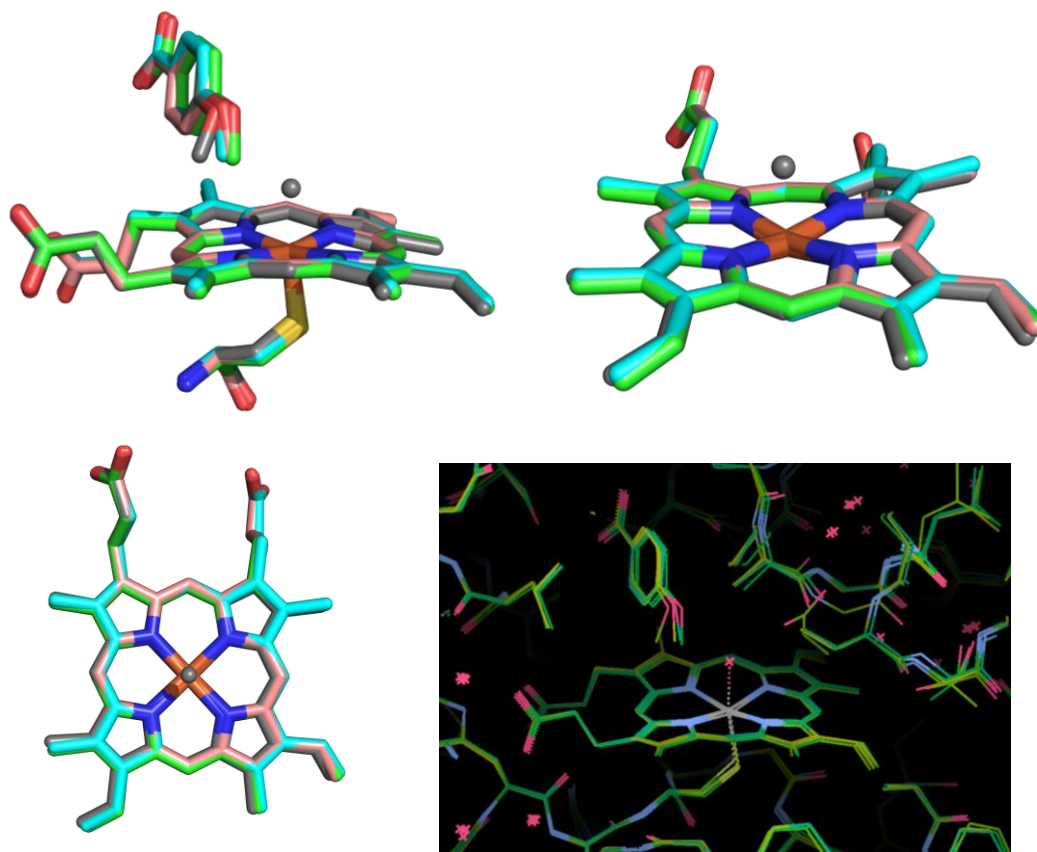

**Figure S30.** Overlaid heme groups in the crystal structures of WT (cyan; 4DO1), T252A (green; 5KDZ), D251N (salmon; 5KDY) and T252E (gray; 7REH) CYP199A4 bound to 4-methoxybenzoic acid.

**Table S10** Measured heme iron position in the crystal structures of 4-methylthiobenzoic acid-bound WT, T252E, T252A and D251N CYP199A4

| Crystal structure             | Displacement of the iron out of the heme plane (plane defined by the four pyrrole nitrogens) | Displacement of the iron out of the heme plane (plane defined by all 24 atoms of the porphyrin) |
|-------------------------------|----------------------------------------------------------------------------------------------|-------------------------------------------------------------------------------------------------|
| WT + 4-methylthioBA (5KT1)    | 0.22                                                                                         | 0.23                                                                                            |
| T252E + 4-methylthioBA (7TP6) | 0.16                                                                                         | 0.13                                                                                            |
| T252A + 4-methylthioBA (8DYB) | 0.05                                                                                         | 0.03                                                                                            |
| D251N + 4-methylthioBA (7TQM) | 0.09                                                                                         | 0.08                                                                                            |

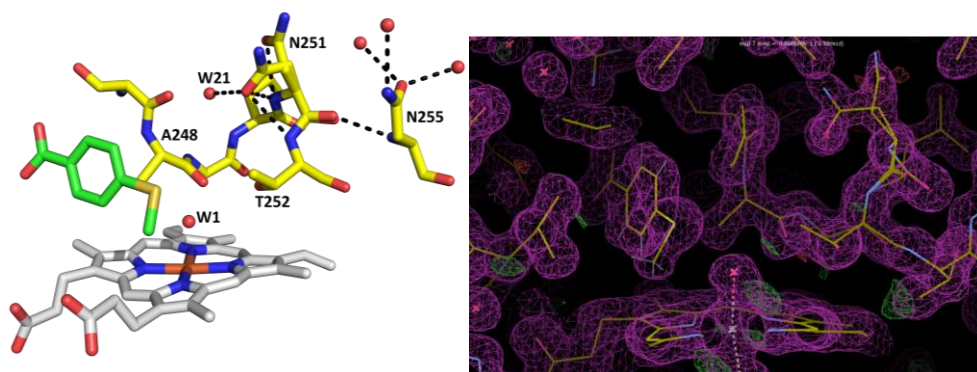

**Figure S31 (a)** D251N<sub>CYP199A4</sub> bound to 4-methylthiobenzoic acid (PDB code: 7TQM)

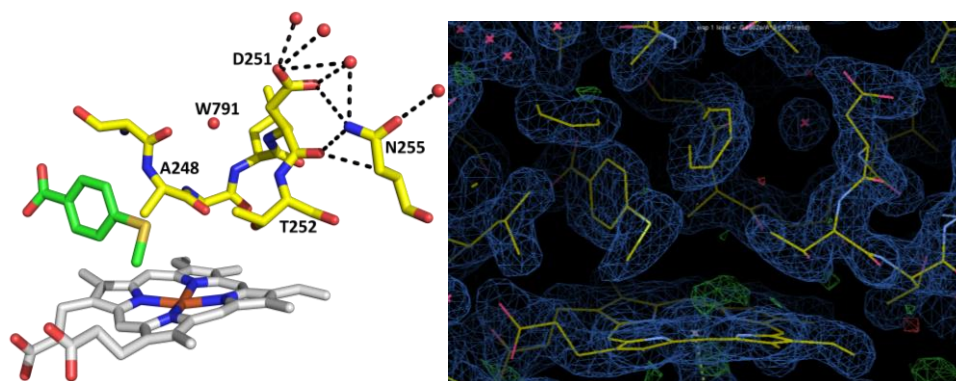

**Figure S31 (b)** WT<sub>CYP199A4</sub> bound to 4-methylthiobenzoic acid (PDB code: 5KT1)

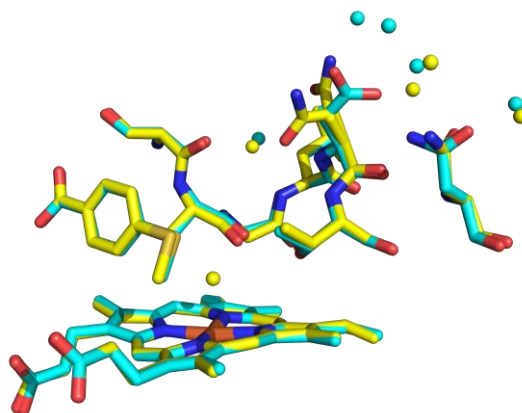

**Figure S31 (c)** Superimposed structures of 4-methylthiobenzoic acid-bound WT (cyan) and D251N (yellow) CYP199A4

In the D251N<sub>CYP199A4</sub> mutant, the mutated N251 side chain is present in two conformations. In one conformation, the N251 side chain has rotated into the active site (~60% occupancy). In this conformation, the asparagine side chain interacts with W21 (3.0 Å), the backbone NH of N251 (2.8 Å), and the backbone NH of T252 (3.0 Å). In the wild-type (WT) enzyme, the aspartate (D251) side chain interacts with N255 (3.5 Å). However, in the D251N mutant, the side chain of N255 has rotated by ~90° and does not interact with the N251 side chain.

**The active-site structure of CYP199A4 is largely unaffected by the T252A, D251N and T252E mutations**

Mutation of T252 to alanine or glutamate, or D251 to asparagine, did not appreciably alter the geometry of the active site of CYP199A4 nor the binding mode of 4-methoxybenzoic acid.

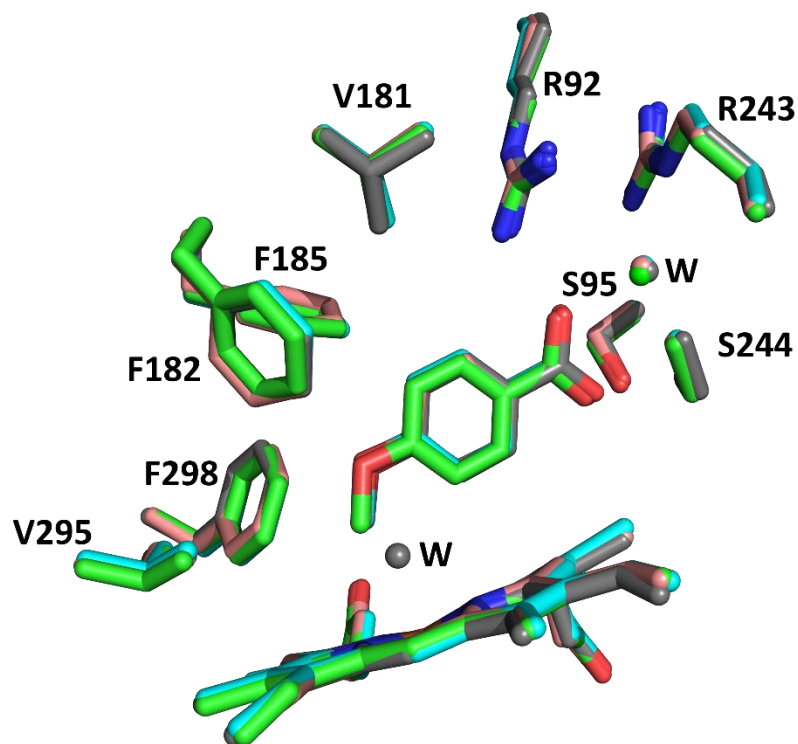

**Figure S32.** Active-site structure of WT CYP199A4 (cyan) and the T252E (gray), D251N (salmon) and T252A (green) isoforms in complex with 4-methoxybenzoic acid. These mutations do not appreciably alter the geometry of the active site nor the substrate binding mode. The D251N and T252A structures were reported previously (PDB codes: 5KDY and 5KDZ).

## Comparison of the active-site structure of CYP199A4 isoforms bound to 4-methylthiobenzoic acid

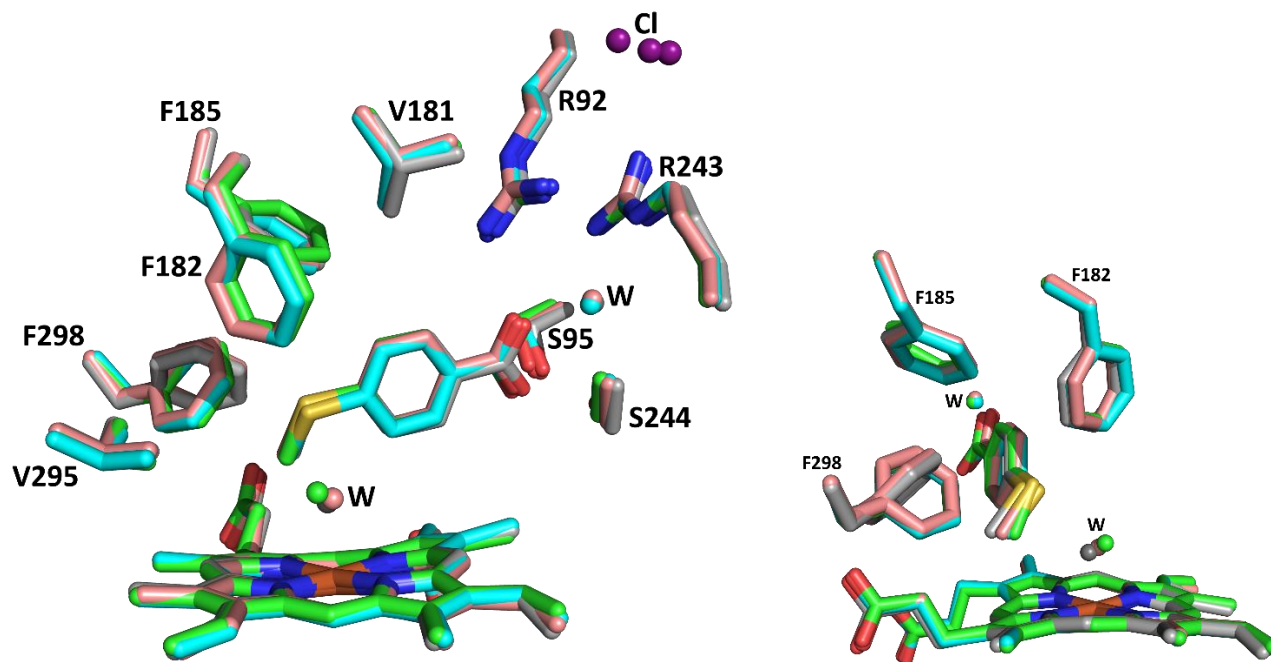

**Figure S33.** The active-site structure of WT CYP199A4 (cyan) and the T252E (gray), D251N (salmon) and T252A (green) mutants in complex with 4-methylthiobenzoic acid. The WT crystal structure was reported previously (PDB code: 5KT1).

A heme-bound aqua ligand is present in the T252E, D251N and T252A crystal structures. In contrast, in the WT crystal structure, the heme is pentacoordinate (the water ligand has been removed by the substrate).

Note that the side chain of F298 is found in different conformations in these structures.

In the T252A crystal structure, the heme-bound aqua ligand is noticeably offset from the axis of the Fe-S bond. The Fe-O bond length is also longer in the T252A structure compared to the T252E and D251N structures (2.46 Å vs. 2.17 Å and 2.31 Å).



## Enantioselectivity of 4-ethylthiobenzoic acid sulfoxidation by CYP199A4 isoforms

**Table S11.** Enantioselectivity of NADH- and H<sub>2</sub>O<sub>2</sub>-supported sulfoxidation of 4-ethylthiobenzoic acid catalyzed by CYP199A4 isoforms.

|                                              | Substrate | Enantiomer 1 | Enantiomer 2 | 1:2 ratio | % ee |
|----------------------------------------------|-----------|--------------|--------------|-----------|------|
| <b>Racemic sulfoxide</b>                     | 563.703   | 685.168      | 699.066      | 0.98      | -    |
| <b>WT_NADH</b>                               | 431.497   | 390.919      | 36.872       | 10.60     | 83%  |
| <b>T252A_NADH</b>                            | 221.069   | 112.907      | 11.17        | 10.11     | 82%  |
| <b>T252E_NADH</b>                            | 790.379   | 35.652       | 6.839        | 5.21      | 68%  |
| <b>D251N_NADH</b>                            | 755.839   | 44.594       | 19.958       | 2.23      | 38%  |
| <b>WT_6 mM H<sub>2</sub>O<sub>2</sub></b>    | 621.171   | 56.754       | 32.382       | 1.75      | 27%  |
| <b>T252A_6 mM H<sub>2</sub>O<sub>2</sub></b> | 3169.367  | 178.883      | 124.751      | 1.43      | 18%  |
| <b>T252E_6 mM H<sub>2</sub>O<sub>2</sub></b> | 1850.834  | 79.859       | 55.354       | 1.44      | 18%  |
| <b>D251N_6 mM H<sub>2</sub>O<sub>2</sub></b> | 2719.882  | 145.148      | 106.376      | 1.36      | 15%  |

Enantiomer numbering based on elution order.

Note that the true enantioselectivity of the H<sub>2</sub>O<sub>2</sub>-driven sulfoxidation reactions catalyzed by the CYP199A4 isoforms could not be determined. H<sub>2</sub>O<sub>2</sub> alone can convert sulfides into sulfoxides. In the presence of H<sub>2</sub>O<sub>2</sub>, formation of racemic sulfoxide through uncatalyzed background oxidation of the sulfide would have occurred alongside the P450 reaction (Figure S33). The estimated enantioselective excess ( $\pm 5\%$ ) if these was taken into account were 35% (T252E), >90% (WT), 35% (T252A) and 35% ee (D251N).

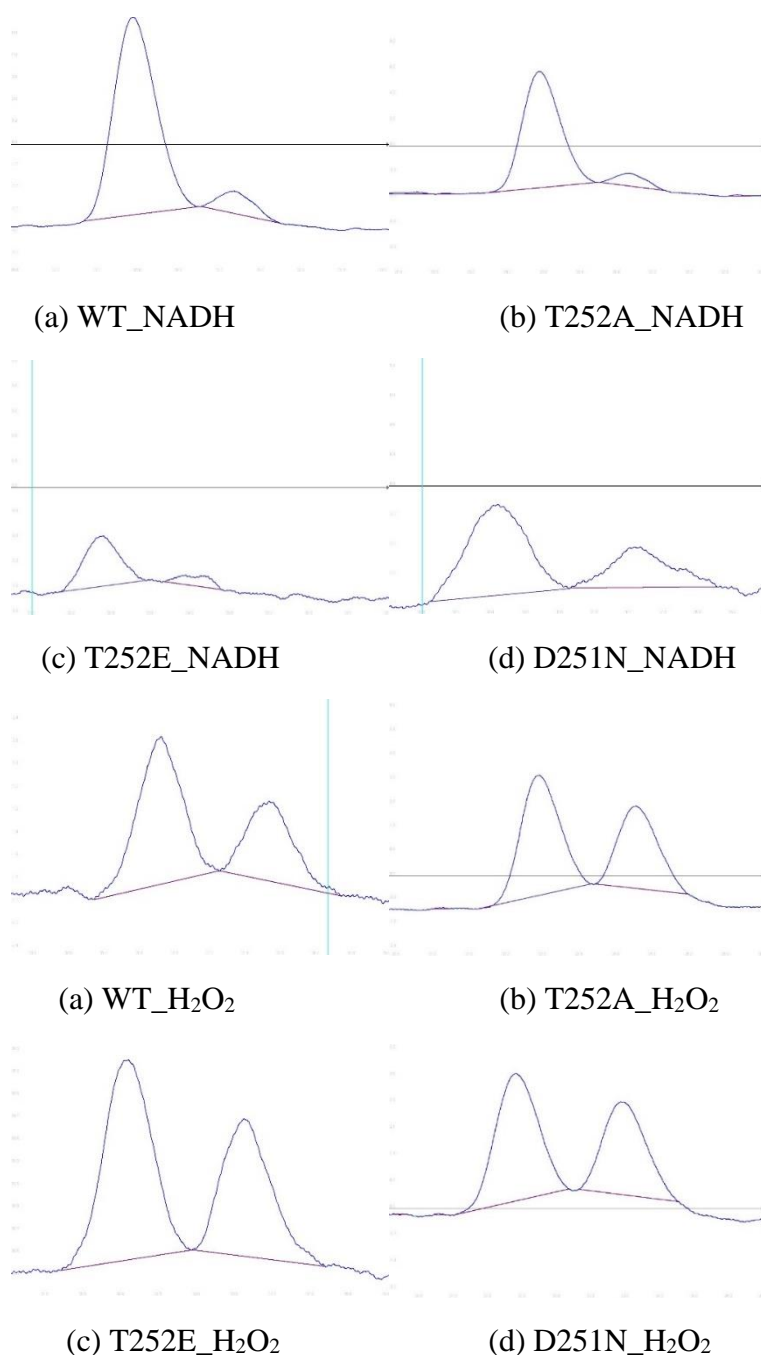

**Figure S34.** Chiral HPLC analysis of NADH- and H<sub>2</sub>O<sub>2</sub>-driven sulfoxidation of 4-ethylthiobenzoic acid catalyzed by CYP199A4 isoforms. In all cases, the major enantiomer was the first to elute. Note that the measured enantioselectivity of the reactions is low for the H<sub>2</sub>O<sub>2</sub>-driven reactions. In the presence of H<sub>2</sub>O<sub>2</sub>, uncatalyzed conversion of 4-ethylthiobenzoic acid into racemic sulfoxide would have occurred alongside the P450 reaction. Because of this background oxidation, we could not accurately determine the true enantioselectivity of the CYP199A4-catalyzed reactions.

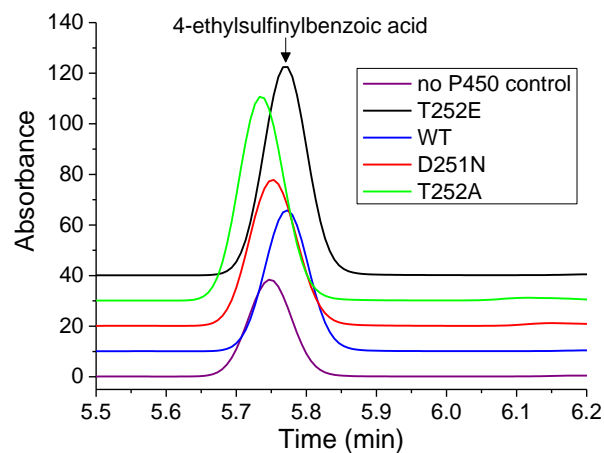

**Figure S35.** The amount of sulfoxidation of 4-ethylthiobenzoic acid that occurred over a 2-hour period in the presence of 6 mM H<sub>2</sub>O<sub>2</sub> at room temperature, with or without P450 present. A substantial amount of sulfoxidation occurred when no P450 was present due to uncatalyzed oxidation by H<sub>2</sub>O<sub>2</sub> (purple). A considerable portion of the sulfoxide in the T252E (black), WT (blue), D251N (red) and T252A (green) reactions would therefore be racemic sulfoxide resulting from background oxidation of the sulfide by H<sub>2</sub>O<sub>2</sub>.
